# Supplementary material for: A comparison of free transfer of radial forearm and anterolateral thigh flaps for head and neck reconstruction
Source: Springer Nature journal article supplement (doi:10.1007/s00238-008-0317-0), 2009-01-09
Supplement: MOESM1 [file 238_2008_317_MOESM1_ESM.doc]

[Plast Reconstr Surg.](javascript:AL_get(this, 'jour', 'Plast Reconstr Surg.');) 2006 Mar;117(3):963-7.[
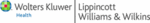
](http://www.ncbi.nlm.nih.gov/entrez/utils/fref.fcgi?PrId=3159&itool=AbstractPlus-def&uid=16525293&db=pubmed&url=http://meta.wkhealth.com/pt/pt-core/template-journal/lwwgateway/media/landingpage.htm?an=00006534-200603000-00039)
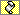
[Links](javascript:PopUpMenu2_Set(Menu16525293);)

## Simple reconstruction with titanium mesh and radial forearm flap after globe-sparing total maxillectomy: a 5-year follow-up study.

[**Hashikawa K**](http://www.ncbi.nlm.nih.gov/sites/entrez?Db=pubmed&Cmd=Search&Term="Hashikawa K"%5BAuthor%5D&itool=EntrezSystem2.PEntrez.Pubmed.Pubmed_ResultsPanel.Pubmed_DiscoveryPanel.Pubmed_RVAbstractPlus), [**Tahara S**](http://www.ncbi.nlm.nih.gov/sites/entrez?Db=pubmed&Cmd=Search&Term="Tahara S"%5BAuthor%5D&itool=EntrezSystem2.PEntrez.Pubmed.Pubmed_ResultsPanel.Pubmed_DiscoveryPanel.Pubmed_RVAbstractPlus), [**Ishida H**](http://www.ncbi.nlm.nih.gov/sites/entrez?Db=pubmed&Cmd=Search&Term="Ishida H"%5BAuthor%5D&itool=EntrezSystem2.PEntrez.Pubmed.Pubmed_ResultsPanel.Pubmed_DiscoveryPanel.Pubmed_RVAbstractPlus), [**Yokoo S**](http://www.ncbi.nlm.nih.gov/sites/entrez?Db=pubmed&Cmd=Search&Term="Yokoo S"%5BAuthor%5D&itool=EntrezSystem2.PEntrez.Pubmed.Pubmed_ResultsPanel.Pubmed_DiscoveryPanel.Pubmed_RVAbstractPlus), [**Sanno T**](http://www.ncbi.nlm.nih.gov/sites/entrez?Db=pubmed&Cmd=Search&Term="Sanno T"%5BAuthor%5D&itool=EntrezSystem2.PEntrez.Pubmed.Pubmed_ResultsPanel.Pubmed_DiscoveryPanel.Pubmed_RVAbstractPlus), [**Terashi H**](http://www.ncbi.nlm.nih.gov/sites/entrez?Db=pubmed&Cmd=Search&Term="Terashi H"%5BAuthor%5D&itool=EntrezSystem2.PEntrez.Pubmed.Pubmed_ResultsPanel.Pubmed_DiscoveryPanel.Pubmed_RVAbstractPlus), [**Nibu K**](http://www.ncbi.nlm.nih.gov/sites/entrez?Db=pubmed&Cmd=Search&Term="Nibu K"%5BAuthor%5D&itool=EntrezSystem2.PEntrez.Pubmed.Pubmed_ResultsPanel.Pubmed_DiscoveryPanel.Pubmed_RVAbstractPlus).

Department of Plastic Surgery, Kobe University Graduate School of Medicine, Kobe, Japan. kazunobu@med.kobe-u.ac.jp

BACKGROUND: Reconstruction of eye globe-sparing total maxillectomy defects is one of the major challenges to reconstructive surgeons. In 1994, the authors developed an uncomplicated and easy reconstructive method, where a titanium mesh is applied for the support of orbital contents, a radial forearm free flap for covering the mesh and the cheek lining, and an obturator prosthesis for palatal and dental rehabilitation. METHODS: Five patients who underwent primary reconstruction with the authors' method after globe-sparing maxillectomy with loss of the orbital floor from 1994 to 1999 and who were followed up for more than 5 years were retrospectively reviewed for (1) the presence of diplopia, (2) the shape of the reconstructed orbital floor assessed by coronal section magnetic resonance imaging, and (3) the presence of infection/exposure of the titanium mesh. RESULTS: Only one of the five patients developed slight diplopia. Coronal magnetic resonance imaging showed that the orbital floor restored with titanium mesh had in all cases maintained a proper shape and position for more than 5 years. No infection or exposure of the titanium mesh had developed in any of the cases, despite exposure to irradiation of not less than 30 Gy. All the patients had well-retentive obturator prostheses. CONCLUSION: This long-term follow-up study demonstrated that the authors' method attained a long-lasting successful outcome functionally and is the method of choice for reconstruction after globe-sparing total maxillectomy.

PMID: 16525293 [PubMed - indexed for MEDLINE]

[J Coll Physicians Surg Pak.](javascript:AL_get(this, 'jour', 'J Coll Physicians Surg Pak.');) 2004 Jan;14(1):29-34.
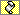
[Links](javascript:PopUpMenu2_Set(Menu14764258);)

## Management of oromandibular cancers.

[**Rashid M**](http://www.ncbi.nlm.nih.gov/sites/entrez?Db=pubmed&Cmd=Search&Term="Rashid M"%5BAuthor%5D&itool=EntrezSystem2.PEntrez.Pubmed.Pubmed_ResultsPanel.Pubmed_DiscoveryPanel.Pubmed_RVAbstractPlus), [**Ahmad T**](http://www.ncbi.nlm.nih.gov/sites/entrez?Db=pubmed&Cmd=Search&Term="Ahmad T"%5BAuthor%5D&itool=EntrezSystem2.PEntrez.Pubmed.Pubmed_ResultsPanel.Pubmed_DiscoveryPanel.Pubmed_RVAbstractPlus), [**Sarwar SU**](http://www.ncbi.nlm.nih.gov/sites/entrez?Db=pubmed&Cmd=Search&Term="Sarwar SU"%5BAuthor%5D&itool=EntrezSystem2.PEntrez.Pubmed.Pubmed_ResultsPanel.Pubmed_DiscoveryPanel.Pubmed_RVAbstractPlus), [**Ansari TN**](http://www.ncbi.nlm.nih.gov/sites/entrez?Db=pubmed&Cmd=Search&Term="Ansari TN"%5BAuthor%5D&itool=EntrezSystem2.PEntrez.Pubmed.Pubmed_ResultsPanel.Pubmed_DiscoveryPanel.Pubmed_RVAbstractPlus), [**Ahmed B**](http://www.ncbi.nlm.nih.gov/sites/entrez?Db=pubmed&Cmd=Search&Term="Ahmed B"%5BAuthor%5D&itool=EntrezSystem2.PEntrez.Pubmed.Pubmed_ResultsPanel.Pubmed_DiscoveryPanel.Pubmed_RVAbstractPlus), [**Ahmed S**](http://www.ncbi.nlm.nih.gov/sites/entrez?Db=pubmed&Cmd=Search&Term="Ahmed S"%5BAuthor%5D&itool=EntrezSystem2.PEntrez.Pubmed.Pubmed_ResultsPanel.Pubmed_DiscoveryPanel.Pubmed_RVAbstractPlus), [**Gul AA**](http://www.ncbi.nlm.nih.gov/sites/entrez?Db=pubmed&Cmd=Search&Term="Gul AA"%5BAuthor%5D&itool=EntrezSystem2.PEntrez.Pubmed.Pubmed_ResultsPanel.Pubmed_DiscoveryPanel.Pubmed_RVAbstractPlus), [**Aslam R**](http://www.ncbi.nlm.nih.gov/sites/entrez?Db=pubmed&Cmd=Search&Term="Aslam R"%5BAuthor%5D&itool=EntrezSystem2.PEntrez.Pubmed.Pubmed_ResultsPanel.Pubmed_DiscoveryPanel.Pubmed_RVAbstractPlus), [**Rashid D**](http://www.ncbi.nlm.nih.gov/sites/entrez?Db=pubmed&Cmd=Search&Term="Rashid D"%5BAuthor%5D&itool=EntrezSystem2.PEntrez.Pubmed.Pubmed_ResultsPanel.Pubmed_DiscoveryPanel.Pubmed_RVAbstractPlus).

Department of Plastic and Reconstructive Surgery, Combined Military Hospital, Rawalpindi. mamoon@isb.comsats.net.pk

OBJECTIVE: To emphasize the role and importance of multidisciplinary approach in the management of oral cavity cancers involving the mandible. DESIGN: Descriptive study. PLACE AND DURATION OF STUDY: The Departments of Plastic and Reconstructive Surgery, ENT / Head and Neck Surgery and Radiation Oncology, Combined Military Hospital, Rawalpindi. Duration spans over a period of six years. SUBJECTS AND METHODS: A total of 63 patients who had biopsy-proven oromandibular tumors, after thorough assessment / staging in Joint Head and Neck Oncology Clinic, underwent resection and reconstruction for malignant oral cavity tumors involving the mandible were included in the study. All the resected tumor specimen were sent for histopathology. All the post-resection defects were properly classified and reconstructed by the plastic surgery team. Postoperatively, all the patients underwent adjuvant full dose radiotherapy at the Department of Radiation Oncology. Complications were recorded and managed accordingly. At one year follow-up all the available patients were assessed for functional and aesthetic restoration and recurrences. RESULTS: Out of 63 patients there were 40 males and 23 females (ratio 1.7 : 1) with an average age of 50 years. Tumor-free resection margins could be achieved in 56 patients. In 88% cases tumor was a Squamous cell carcinoma. Radical neck dissections were carried on in 27 patients. Radial forearm free flap was used in 27 patients, pectoralis major myocutaneous flap in 19, free fibula osteocutaneous flap in 10, rectus-abdominis myocutaneous free flap with Implant was used in 3 patients to reconstruct the post-resection defects. There was only one total flap loss and 3 partial flap losses. Implant exposure was encountered in 4 instances with 3 major and 5 minor fistulae. At one year follow-up, 56 patients were available. Thirty-seven patients had intelligible speech, 15 patients were taking normal diet and in 33 patients there was a satisfactory mandibular contour restoration. Seven patients had recurrences, 2 were not traceable and 5 patients had died by that time. CONCLUSION: A multidisciplinary collaboration is the key to effectively manage this group of extremely debilitating malignancies.

PMID: 14764258 [PubMed - indexed for MEDLINE]

[Plast Reconstr Surg.](javascript:AL_get(this, 'jour', 'Plast Reconstr Surg.');) 1990 Feb;85(2):258-66.
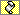
[Links](javascript:PopUpMenu2_Set(Menu2300632);)

## The radial forearm flap: reconstructive applications and donor-site defects in 35 consecutive patients.

[**Swanson E**](http://www.ncbi.nlm.nih.gov/sites/entrez?Db=pubmed&Cmd=Search&Term="Swanson E"%5BAuthor%5D&itool=EntrezSystem2.PEntrez.Pubmed.Pubmed_ResultsPanel.Pubmed_DiscoveryPanel.Pubmed_RVAbstractPlus), [**Boyd JB**](http://www.ncbi.nlm.nih.gov/sites/entrez?Db=pubmed&Cmd=Search&Term="Boyd JB"%5BAuthor%5D&itool=EntrezSystem2.PEntrez.Pubmed.Pubmed_ResultsPanel.Pubmed_DiscoveryPanel.Pubmed_RVAbstractPlus), [**Manktelow RT**](http://www.ncbi.nlm.nih.gov/sites/entrez?Db=pubmed&Cmd=Search&Term="Manktelow RT"%5BAuthor%5D&itool=EntrezSystem2.PEntrez.Pubmed.Pubmed_ResultsPanel.Pubmed_DiscoveryPanel.Pubmed_RVAbstractPlus).

Department of Surgery, Toronto General Hospital.

Thirty-five consecutive patients treated with the radial forearm flap were reviewed. This flap was used in head and neck reconstruction in 25 patients, soft-tissue cover of an extremity in 9 patients, and as a new technique for penile reconstruction in 1 patient. Osteocutaneous flaps were used for mandibular reconstruction in 13 patients. In 6 patients innervated flaps were used to provide sensation on the dorsum of the hand or on the weight-bearing surface of the foot. There was only one total flap failure and no partial failures. Recipient-site complications were few, with prompt healing and very acceptable appearance. Donor-site complications included partial loss of the skin graft with tendon exposure in 10 patients (33 percent), an unsatisfactory appearance in 5 patients (17 percent), and one case of radial fracture (8 percent). On functional testing, there was no significant loss of strength or joint mobility in the donor extremity in 19/20 patients. The authors recommend measures to reduce donor-site morbidity and conclude that, with an acceptable donor site, this flap is valuable in a variety of reconstructive applications.

PMID: 2300632 [PubMed - indexed for MEDLINE]

[Ann Thorac Surg.](javascript:AL_get(this, 'jour', 'Ann Thorac Surg.');) 2008 Apr;85(4):1473-82.[
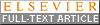
](http://www.ncbi.nlm.nih.gov/entrez/utils/fref.fcgi?PrId=3048&itool=AbstractPlus-def&uid=18355565&db=pubmed&url=http://linkinghub.elsevier.com/retrieve/pii/S0003-4975(08)00023-4)
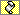
[Links](javascript:PopUpMenu2_Set(Menu18355565);)

## Operative treatment of coronary atherosclerosis.

[**Barner HB**](http://www.ncbi.nlm.nih.gov/sites/entrez?Db=pubmed&Cmd=Search&Term="Barner HB"%5BAuthor%5D&itool=EntrezSystem2.PEntrez.Pubmed.Pubmed_ResultsPanel.Pubmed_DiscoveryPanel.Pubmed_RVAbstractPlus).

Division of Cardiothoracic Surgery, St. Louis University, St. Louis, Missouri 63108, USA. hbarner@slu.edu

The evolution of percutaneous intervention has reduced the prevalence of coronary bypass surgery in a patient population that is older, with more comorbidity and advanced coronary disease. Despite this less favorable group, perioperative mortality has continued to decline as the operation improves. The latter includes off-pump coronary grafting, smaller incisions, better intraoperative myocardial preservation, improving management of cardiopulmonary bypass, perioperative glucose control, and increasing use of arterial conduits as the radial artery comes of age and the gastroepiploic artery is reborn as a free graft. This brief review of the basics of coronary artery bypass is part experience with an effort to be fair-minded and balanced and to include that which is new and promising. It is imperative that we continue to innovate and distill the best from the old so that we can provide the optimal intervention for coronary artery disease.

PMID: 18355565 [PubMed - indexed for MEDLINE]

[Br J Plast Surg.](javascript:AL_get(this, 'jour', 'Br J Plast Surg.');) 1984 Apr;37(2):149-59.
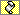
[Links](javascript:PopUpMenu2_Set(Menu6713155);)

Comment in:

[Br J Plast Surg. 2003 Dec;56(8):837-9.](http://www.ncbi.nlm.nih.gov/pubmed/14615267?ordinalpos=1&itool=EntrezSystem2.PEntrez.Pubmed.Pubmed_ResultsPanel.Pubmed_DiscoveryPanel.Pubmed_RVAbstractPlus)

## The free thigh flap: a new free flap concept based on the septocutaneous artery.

[**Song YG**](http://www.ncbi.nlm.nih.gov/sites/entrez?Db=pubmed&Cmd=Search&Term="Song YG"%5BAuthor%5D&itool=EntrezSystem2.PEntrez.Pubmed.Pubmed_ResultsPanel.Pubmed_DiscoveryPanel.Pubmed_RVAbstractPlus), [**Chen GZ**](http://www.ncbi.nlm.nih.gov/sites/entrez?Db=pubmed&Cmd=Search&Term="Chen GZ"%5BAuthor%5D&itool=EntrezSystem2.PEntrez.Pubmed.Pubmed_ResultsPanel.Pubmed_DiscoveryPanel.Pubmed_RVAbstractPlus), [**Song YL**](http://www.ncbi.nlm.nih.gov/sites/entrez?Db=pubmed&Cmd=Search&Term="Song YL"%5BAuthor%5D&itool=EntrezSystem2.PEntrez.Pubmed.Pubmed_ResultsPanel.Pubmed_DiscoveryPanel.Pubmed_RVAbstractPlus).

Based on the septocutaneous artery flap concept, the thigh, which is the commonest conventional donor site for split-skin grafts, can also become a donor area for skin flaps. The thigh flap, with its large and long neuro-vascular pedicle, can be used either as a free flap or as an island flap as an alternative to the lower abdominal flap, groin flap, tensor fasciae latae myocutaneous flap, sartorius myocutaneous flap or the gracilis myocutaneous flap. The anatomical basis, operative technique and characteristics of the thigh flap are discussed.

PMID: 6713155 [PubMed - indexed for MEDLINE]

[Plast Reconstr Surg.](javascript:AL_get(this, 'jour', 'Plast Reconstr Surg.');) 1996 Apr;97(5):985-92.[
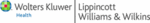
](http://www.ncbi.nlm.nih.gov/entrez/utils/fref.fcgi?PrId=3159&itool=AbstractPlus-def&uid=8619002&db=pubmed&url=http://meta.wkhealth.com/pt/pt-core/template-journal/lwwgateway/media/landingpage.htm?issn=0032-1052&volume=97&issue=5&spage=985)
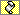
[Links](javascript:PopUpMenu2_Set(Menu8619002);)

## Consideration of a thin flap as an entity and clinical applications of the thin anterolateral thigh flap.

[**Kimura N**](http://www.ncbi.nlm.nih.gov/sites/entrez?Db=pubmed&Cmd=Search&Term="Kimura N"%5BAuthor%5D&itool=EntrezSystem2.PEntrez.Pubmed.Pubmed_ResultsPanel.Pubmed_DiscoveryPanel.Pubmed_RVAbstractPlus), [**Satoh K**](http://www.ncbi.nlm.nih.gov/sites/entrez?Db=pubmed&Cmd=Search&Term="Satoh K"%5BAuthor%5D&itool=EntrezSystem2.PEntrez.Pubmed.Pubmed_ResultsPanel.Pubmed_DiscoveryPanel.Pubmed_RVAbstractPlus).

Department of Plastic and Reconstructive Surgery at the Chiba Emergency Medical Center, USA.

A defatted (thinned) anterolateral thigh flap was designed to reconstruct skin defects requiring thin flap coverage. We used this flap as a free flap for five cases of skin defects, and the outcomes of the reconstructions were all successful. The vascular pedicle of this flap, the cutaneous perforator of the lateral circumflex femoral artery, is about 8 cm long and 2 mm in diameter, and it is ideal for microvascular anastomosis. Thinning is performed in about 3 to 4 mm of thickness almost uniformly except for the vascular pedicle. It was ascertained as one of the useful donor sites of the free thin flap. The virtue of the thin anterolateral thigh flap is its uniform thinness compared with other thin flaps reported previously--the thin groin flap and the thin rectus abdominis musculocutaneous flap. We considered thin flaps as an entity, and they are classified into three types.

PMID: 8619002 [PubMed - indexed for MEDLINE]

[Plast Reconstr Surg.](javascript:AL_get(this, 'jour', 'Plast Reconstr Surg.');) 2006 Mar;117(3):1004-8.[
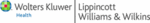
](http://www.ncbi.nlm.nih.gov/entrez/utils/fref.fcgi?PrId=3159&itool=AbstractPlus-def&uid=16525300&db=pubmed&url=http://meta.wkhealth.com/pt/pt-core/template-journal/lwwgateway/media/landingpage.htm?an=00006534-200603000-00047)
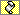
[Links](javascript:PopUpMenu2_Set(Menu16525300);)

Comment in:

[Plast Reconstr Surg. 2007 Jun;119(7):2327-8; author reply 2328.](http://www.ncbi.nlm.nih.gov/pubmed/17519754?ordinalpos=1&itool=EntrezSystem2.PEntrez.Pubmed.Pubmed_ResultsPanel.Pubmed_DiscoveryPanel.Pubmed_RVAbstractPlus)

## Thin anterolateral thigh perforator flap using a modified perforator microdissection technique and its clinical application for foot resurfacing.

[**Yang WG**](http://www.ncbi.nlm.nih.gov/sites/entrez?Db=pubmed&Cmd=Search&Term="Yang WG"%5BAuthor%5D&itool=EntrezSystem2.PEntrez.Pubmed.Pubmed_ResultsPanel.Pubmed_DiscoveryPanel.Pubmed_RVAbstractPlus), [**Chiang YC**](http://www.ncbi.nlm.nih.gov/sites/entrez?Db=pubmed&Cmd=Search&Term="Chiang YC"%5BAuthor%5D&itool=EntrezSystem2.PEntrez.Pubmed.Pubmed_ResultsPanel.Pubmed_DiscoveryPanel.Pubmed_RVAbstractPlus), [**Wei FC**](http://www.ncbi.nlm.nih.gov/sites/entrez?Db=pubmed&Cmd=Search&Term="Wei FC"%5BAuthor%5D&itool=EntrezSystem2.PEntrez.Pubmed.Pubmed_ResultsPanel.Pubmed_DiscoveryPanel.Pubmed_RVAbstractPlus), [**Feng GM**](http://www.ncbi.nlm.nih.gov/sites/entrez?Db=pubmed&Cmd=Search&Term="Feng GM"%5BAuthor%5D&itool=EntrezSystem2.PEntrez.Pubmed.Pubmed_ResultsPanel.Pubmed_DiscoveryPanel.Pubmed_RVAbstractPlus), [**Chen KT**](http://www.ncbi.nlm.nih.gov/sites/entrez?Db=pubmed&Cmd=Search&Term="Chen KT"%5BAuthor%5D&itool=EntrezSystem2.PEntrez.Pubmed.Pubmed_ResultsPanel.Pubmed_DiscoveryPanel.Pubmed_RVAbstractPlus).

Department of Plastic and Reconstructive Surgery, Chang Gung Memorial Hospital, ChiaYi, Taiwan. yang94@adm.cgmh.org

BACKGROUND: A thin skin flap is often required for optimal resurfacing of particular areas of the body. An anterolateral thigh perforator flap can be thinned to an extent to which it is vascularized by the subdermal plexus only. This study presents a novel flap thinning technique and its application for resurfacing the dorsum of the foot. METHODS: From July of 2002 to October of 2003, 18 patients underwent resurfacing of the dorsum of the foot with thin anterolateral thigh flaps. The main perforators were strategically located in the flap center to keep the peripheral area within the vascular territory. The flaps were larger than needed, initially elevated subfascially, and then thinned to the suitable thickness while the pedicle was still attached. The dissection of perforators in the adipose layer close to the dermis entry was carried out microscopically. Flap sizes ranged from 3 x 3 to 16 x 8 cm. RESULTS: Seventeen flaps survived completely and one had distal superficial necrosis of 1 x 2 cm. No debulking procedures were necessary. Average follow-up was 12 months. CONCLUSIONS: A thin flap vascularized through subdermal plexus is reliable. Microsurgical dissection of the perforator is a recommended technique. The thin anterolateral thigh perforator flap provides ideal reconstruction in resurfacing the dorsum of the foot.

PMID: 16525300 [PubMed - indexed for MEDLINE]

[Plast Reconstr Surg.](javascript:AL_get(this, 'jour', 'Plast Reconstr Surg.');) 1993 Sep;92(3):411-20.
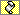
[Links](javascript:PopUpMenu2_Set(Menu8341739);)

## Free combined composite flaps using the lateral circumflex femoral system for repair of massive defects of the head and neck regions: an introduction to the chimeric flap principle.

[**Koshima I**](http://www.ncbi.nlm.nih.gov/sites/entrez?Db=pubmed&Cmd=Search&Term="Koshima I"%5BAuthor%5D&itool=EntrezSystem2.PEntrez.Pubmed.Pubmed_ResultsPanel.Pubmed_DiscoveryPanel.Pubmed_RVAbstractPlus), [**Yamamoto H**](http://www.ncbi.nlm.nih.gov/sites/entrez?Db=pubmed&Cmd=Search&Term="Yamamoto H"%5BAuthor%5D&itool=EntrezSystem2.PEntrez.Pubmed.Pubmed_ResultsPanel.Pubmed_DiscoveryPanel.Pubmed_RVAbstractPlus), [**Hosoda M**](http://www.ncbi.nlm.nih.gov/sites/entrez?Db=pubmed&Cmd=Search&Term="Hosoda M"%5BAuthor%5D&itool=EntrezSystem2.PEntrez.Pubmed.Pubmed_ResultsPanel.Pubmed_DiscoveryPanel.Pubmed_RVAbstractPlus), [**Moriguchi T**](http://www.ncbi.nlm.nih.gov/sites/entrez?Db=pubmed&Cmd=Search&Term="Moriguchi T"%5BAuthor%5D&itool=EntrezSystem2.PEntrez.Pubmed.Pubmed_ResultsPanel.Pubmed_DiscoveryPanel.Pubmed_RVAbstractPlus), [**Orita Y**](http://www.ncbi.nlm.nih.gov/sites/entrez?Db=pubmed&Cmd=Search&Term="Orita Y"%5BAuthor%5D&itool=EntrezSystem2.PEntrez.Pubmed.Pubmed_ResultsPanel.Pubmed_DiscoveryPanel.Pubmed_RVAbstractPlus), [**Nagayama H**](http://www.ncbi.nlm.nih.gov/sites/entrez?Db=pubmed&Cmd=Search&Term="Nagayama H"%5BAuthor%5D&itool=EntrezSystem2.PEntrez.Pubmed.Pubmed_ResultsPanel.Pubmed_DiscoveryPanel.Pubmed_RVAbstractPlus).

Department of Plastic and Reconstructive Surgery, Kawasaki Medical School, Okayama, Japan.

Chimeric composite flaps combined using microanastomoses consist of two or more flaps or tissues, each with an isolated pedicle and a single vascular source. Free combined chimeric flaps using the lateral circumflex femoral system were used to treat massive composite defects of the head and neck in 10 cases. A combined anterolateral thigh flap and vascularized iliac bone graft based on the lateral circumflex femoral system and the deep circumflex iliac system was the most commonly used combination. An anteromedial thigh flap and a paraumbilical perforator-based flap were also combined with this principal combination. The advantages of this chimeric flap over other osteocutaneous flaps are: (1) The flap is relatively thin and the pedicle vessels are up to 10 cm longer and are wider than those of other flaps for easier harvesting of the flap. (2) It is unnecessary to reposition the patient. (3) The vascular pedicle to the skin can be separated from that of the bone. (4) The donor site is not close to the recipient site. (5) The donor scar is in an unexposed area. (6) The skin territory of this flap is extremely wide. (7) A combined anterolateral and anteromedial thigh flap and vascularized iliac bone graft can be easily obtained as an extended combined osteocutaneous flap. (8) Other neighboring skin flaps, such as a groin flap, a paraumbilical perforator-based flap, or a medial thigh flap, can be combined with this chimeric flap because several major muscle branches to be anastomosed derive from the lateral circumflex femoral system. Chimeric composite flaps using the lateral circumflex femoral system are considered suitable for the repair of massive composite defects of the head and neck.

PMID: 8341739 [PubMed - indexed for MEDLINE]

[Plast Reconstr Surg.](javascript:AL_get(this, 'jour', 'Plast Reconstr Surg.');) 2005 Jan;115(1):142-7.[
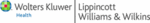
](http://www.ncbi.nlm.nih.gov/entrez/utils/fref.fcgi?PrId=3159&itool=AbstractPlus-def&uid=15622244&db=pubmed&url=http://meta.wkhealth.com/pt/pt-core/template-journal/lwwgateway/media/landingpage.htm?issn=0032-1052&volume=115&issue=1&spage=142)
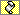
[Links](javascript:PopUpMenu2_Set(Menu15622244);)

## The use of anterolateral thigh perforator flaps in chronic osteomyelitis of the lower extremity.

[**Hong JP**](http://www.ncbi.nlm.nih.gov/sites/entrez?Db=pubmed&Cmd=Search&Term="Hong JP"%5BAuthor%5D&itool=EntrezSystem2.PEntrez.Pubmed.Pubmed_ResultsPanel.Pubmed_DiscoveryPanel.Pubmed_RVAbstractPlus), [**Shin HW**](http://www.ncbi.nlm.nih.gov/sites/entrez?Db=pubmed&Cmd=Search&Term="Shin HW"%5BAuthor%5D&itool=EntrezSystem2.PEntrez.Pubmed.Pubmed_ResultsPanel.Pubmed_DiscoveryPanel.Pubmed_RVAbstractPlus), [**Kim JJ**](http://www.ncbi.nlm.nih.gov/sites/entrez?Db=pubmed&Cmd=Search&Term="Kim JJ"%5BAuthor%5D&itool=EntrezSystem2.PEntrez.Pubmed.Pubmed_ResultsPanel.Pubmed_DiscoveryPanel.Pubmed_RVAbstractPlus), [**Wei FC**](http://www.ncbi.nlm.nih.gov/sites/entrez?Db=pubmed&Cmd=Search&Term="Wei FC"%5BAuthor%5D&itool=EntrezSystem2.PEntrez.Pubmed.Pubmed_ResultsPanel.Pubmed_DiscoveryPanel.Pubmed_RVAbstractPlus), [**Chung YK**](http://www.ncbi.nlm.nih.gov/sites/entrez?Db=pubmed&Cmd=Search&Term="Chung YK"%5BAuthor%5D&itool=EntrezSystem2.PEntrez.Pubmed.Pubmed_ResultsPanel.Pubmed_DiscoveryPanel.Pubmed_RVAbstractPlus).

Department of Plastic and Reconstructive Surgery, Asan Medical Center, University of Ulsan, College of Medicine, Seoul, Korea. joonphong@amc.seoul.kr

From April of 2000 to May of 2003, 28 consecutive patients with chronic osteomyelitis of the lower extremity underwent surgical debridement and reconstruction with anterolateral thigh perforator flaps (six cases were combined with vastus lateralis muscle flaps). All wounds were open for a minimum period of 6 weeks (average, 24.7 months; range, 6 weeks to 52 months). The average patient age was 42.8 years (range, 18 to 71 years), there were 21 male and seven female patients, and the average follow-up period was 18.2 months (range, 5 to 41 months). The cause of injury was an open fracture in 10 cases, secondary wound complications after reduction in eight cases, and diabetic foot in 10 cases. The surface defects ranged from 50 to 153 cm. The wounds were debrided an average of 2.5 times and then reconstructed with flap and treated with antibiotics for 6 weeks. Antibiotic beads were used in six cases and secondary bone graft procedures were performed in seven cases 3 months after the flap coverage. All 28 flaps were successful without any signs of recurrences or persistent osteomyelitis, but partial wound dehiscence was observed during early rehabilitation in two cases suspected of delayed healing caused by diabetes. These wounds healed spontaneously. All patients achieved acceptable gait function after rehabilitation. No debulking procedure was necessary in any case. Although the muscle flap is known to provide superior vascular supply, the type of flap used for coverage seems to be less critical in the final outcome, provided that total debridement and obliteration of dead spaces are achieved. A well-vascularized anterolateral thigh perforator flap was successfully used to combat infection and bring stability to wounds with chronic osteomyelitis.

PMID: 15622244 [PubMed - indexed for MEDLINE]

[Plast Reconstr Surg.](javascript:AL_get(this, 'jour', 'Plast Reconstr Surg.');) 2002 Jun;109(7):2219-26; discussion 2227-30.[
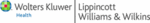
](http://www.ncbi.nlm.nih.gov/entrez/utils/fref.fcgi?PrId=3159&itool=AbstractPlus-def&uid=12045540&db=pubmed&url=http://meta.wkhealth.com/pt/pt-core/template-journal/lwwgateway/media/landingpage.htm?issn=0032-1052&volume=109&issue=7&spage=2219)
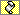
[Links](javascript:PopUpMenu2_Set(Menu12045540);)

Comment in:

[Plast Reconstr Surg. 2003 Jun;111(7):2481.](http://www.ncbi.nlm.nih.gov/pubmed/12794510?ordinalpos=1&itool=EntrezSystem2.PEntrez.Pubmed.Pubmed_ResultsPanel.Pubmed_DiscoveryPanel.Pubmed_RVAbstractPlus)

## Have we found an ideal soft-tissue flap? An experience with 672 anterolateral thigh flaps.

[**Wei FC**](http://www.ncbi.nlm.nih.gov/sites/entrez?Db=pubmed&Cmd=Search&Term="Wei FC"%5BAuthor%5D&itool=EntrezSystem2.PEntrez.Pubmed.Pubmed_ResultsPanel.Pubmed_DiscoveryPanel.Pubmed_RVAbstractPlus), [**Jain V**](http://www.ncbi.nlm.nih.gov/sites/entrez?Db=pubmed&Cmd=Search&Term="Jain V"%5BAuthor%5D&itool=EntrezSystem2.PEntrez.Pubmed.Pubmed_ResultsPanel.Pubmed_DiscoveryPanel.Pubmed_RVAbstractPlus), [**Celik N**](http://www.ncbi.nlm.nih.gov/sites/entrez?Db=pubmed&Cmd=Search&Term="Celik N"%5BAuthor%5D&itool=EntrezSystem2.PEntrez.Pubmed.Pubmed_ResultsPanel.Pubmed_DiscoveryPanel.Pubmed_RVAbstractPlus), [**Chen HC**](http://www.ncbi.nlm.nih.gov/sites/entrez?Db=pubmed&Cmd=Search&Term="Chen HC"%5BAuthor%5D&itool=EntrezSystem2.PEntrez.Pubmed.Pubmed_ResultsPanel.Pubmed_DiscoveryPanel.Pubmed_RVAbstractPlus), [**Chuang DC**](http://www.ncbi.nlm.nih.gov/sites/entrez?Db=pubmed&Cmd=Search&Term="Chuang DC"%5BAuthor%5D&itool=EntrezSystem2.PEntrez.Pubmed.Pubmed_ResultsPanel.Pubmed_DiscoveryPanel.Pubmed_RVAbstractPlus), [**Lin CH**](http://www.ncbi.nlm.nih.gov/sites/entrez?Db=pubmed&Cmd=Search&Term="Lin CH"%5BAuthor%5D&itool=EntrezSystem2.PEntrez.Pubmed.Pubmed_ResultsPanel.Pubmed_DiscoveryPanel.Pubmed_RVAbstractPlus).

Department of Plastic and Reconstructive Surgery, Chang Gung Memorial Hospital, Medical College and University, 199 Tung Hwa North Road, Taipei 10591, Taiwan. fcw2007@adm.cgmh.org.tw

The free anterolateral thigh flap is becoming one of the most preferred options for soft-tissue reconstruction. Between June of 1996 and August of 2000, 672 anterolateral thigh flaps were used in 660 patients at Chang Gung Memorial Hospital. Four hundred eighty-four anterolateral thigh flaps were used for head and neck region recontruction in 475 patients, 58 flaps were used for upper extremity reconstruction in 58 patients, 121 flaps were used for lower extremity reconstruction in 119 patients, and nine flaps were used for trunk reconstruction in nine patients. Of the 672 flaps used in total, a majority (439) were musculocutaneous perforator flaps. Sixty-five were septocutaneous vessel flaps. Of these 504 flaps, 350 were fasciocutaneous and 154 were cutaneous flaps. Of the remaining 168 flaps, 95 were musculocutaneous flaps, 63 were chimeric flaps, and the remaining ten were composite musculocutaneous perforator flaps with the tensor fasciae latae. Total flap failure occurred in 12 patients (1.79 percent of the flaps) and partial failure occurred in 17 patients (2.53 percent of the flaps). Of the 12 flaps that failed completely, five were reconstructed with second anterolateral thigh flaps, four with pedicled flaps, one with a free radial forearm flap, one with skin grafting, and one with primary closure. Of the 17 flaps that failed partially, three were reconstructed with anterolateral thigh flaps, one with a free radial forearm flap, five with pedicled flaps, and eight with primary suture, skin grafting, and conservative methods.In this large series, a consistent anatomy of the main pedicle of the anterolateral thigh flap was observed. In cutaneous and fasciocutaneous flaps, the skin vessels (musculocutaneous perforators or septocutaneous vessels) were found and followed until they reached the main pedicle, regardless of the anatomic position. There were only six cases in this series in which no skin vessels were identified during the harvesting of cutaneous or fasciocutaneous anterolateral thigh flaps. In 87.1 percent of the cutaneous or fasciocutaneous flaps, the skin vessels were found to be musculocutaneous perforators; in 12.9 percent, they were found as septocutaneous vessels. The anterolateral thigh flap is a reliable flap that supplies a large area of skin. This flap can be harvested irrespective of whether the skin vessels are septocutaneous or musculocutaneous. It is a versatile soft-tissue flap in which thickness and volume can be adjusted for the extent of the defect, and it can replace most soft-tissue free flaps in most clinical situations.

PMID: 12045540 [PubMed - indexed for MEDLINE]

[Plast Reconstr Surg.](javascript:AL_get(this, 'jour', 'Plast Reconstr Surg.');) 1993 Sep;92(3):421-8; discussion 429-30.
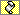
[Links](javascript:PopUpMenu2_Set(Menu8341740);)

## Free anterolateral thigh flaps for reconstruction of head and neck defects.

[**Koshima I**](http://www.ncbi.nlm.nih.gov/sites/entrez?Db=pubmed&Cmd=Search&Term="Koshima I"%5BAuthor%5D&itool=EntrezSystem2.PEntrez.Pubmed.Pubmed_ResultsPanel.Pubmed_DiscoveryPanel.Pubmed_RVAbstractPlus), [**Fukuda H**](http://www.ncbi.nlm.nih.gov/sites/entrez?Db=pubmed&Cmd=Search&Term="Fukuda H"%5BAuthor%5D&itool=EntrezSystem2.PEntrez.Pubmed.Pubmed_ResultsPanel.Pubmed_DiscoveryPanel.Pubmed_RVAbstractPlus), [**Yamamoto H**](http://www.ncbi.nlm.nih.gov/sites/entrez?Db=pubmed&Cmd=Search&Term="Yamamoto H"%5BAuthor%5D&itool=EntrezSystem2.PEntrez.Pubmed.Pubmed_ResultsPanel.Pubmed_DiscoveryPanel.Pubmed_RVAbstractPlus), [**Moriguchi T**](http://www.ncbi.nlm.nih.gov/sites/entrez?Db=pubmed&Cmd=Search&Term="Moriguchi T"%5BAuthor%5D&itool=EntrezSystem2.PEntrez.Pubmed.Pubmed_ResultsPanel.Pubmed_DiscoveryPanel.Pubmed_RVAbstractPlus), [**Soeda S**](http://www.ncbi.nlm.nih.gov/sites/entrez?Db=pubmed&Cmd=Search&Term="Soeda S"%5BAuthor%5D&itool=EntrezSystem2.PEntrez.Pubmed.Pubmed_ResultsPanel.Pubmed_DiscoveryPanel.Pubmed_RVAbstractPlus), [**Ohta S**](http://www.ncbi.nlm.nih.gov/sites/entrez?Db=pubmed&Cmd=Search&Term="Ohta S"%5BAuthor%5D&itool=EntrezSystem2.PEntrez.Pubmed.Pubmed_ResultsPanel.Pubmed_DiscoveryPanel.Pubmed_RVAbstractPlus).

Department of Plastic and Reconstructive Surgery, Kawasaki Medical School, Okayama, Japan.

The anterolateral thigh flap is a septocutaneous artery flap based on the septocutaneous or muscle perforators of the lateral circumflex femoral system. Little has been reported about the variations in its vascular anatomy and its application for head and neck reconstruction. We report 22 cases in which this flap was used for the reconstruction of head and neck defects. Based on our clinical and cadevaric experiences, the derivation of the vascular pedicle of this flap has four variations by which the septocutaneous perforators are derived from the descending branch of the lateral circumflex femoral system and/or from the transverse branch of that system, or for which there are no septocutaneous perforators but there are muscle perforators originating from the lateral circumflex femoral system. Clinically, the vascular variations and the locations of perforators of this system can be determined preoperatively with stereoangiograms or simple angiograms and Doppler audiometry. The anterolateral thigh fasciocutaneous flap is suitable for reconstruction of defects in an oral floor with tongue and esophageal deficits, scalp defects with dural defects, and for large full thickness defects of the lip. The advantages of this flap are safe elevation, a long and wide vascular pedicle, skin that is generally thin, and good pliability. Even if the skin is thick, a thinner flap can be created by sacrificing a large amount of fatty tissue. Furthermore, the skin territory is very wide and long. The donor defect can often be closed directly with its scar being less noticeable. The disadvantage of this flap is that the anatomy of the pedicle vessels has irregular derivation from the main vessels. This can be overcome, however, by employing preoperative stereoangiograms.

PMID: 8341740 [PubMed - indexed for MEDLINE]

[Arch Otolaryngol Head Neck Surg.](javascript:AL_get(this, 'jour', 'Arch Otolaryngol Head Neck Surg.');) 2004 Jul;130(7):813-8.[
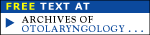
](http://www.ncbi.nlm.nih.gov/entrez/utils/fref.fcgi?PrId=3051&itool=AbstractPlus-def&uid=15262756&db=pubmed&url=http://archotol.ama-assn.org/cgi/pmidlookup?view=long&pmid=15262756)
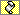
[Links](javascript:PopUpMenu2_Set(Menu15262756);)

## The anterolateral thigh flap: radial forearm's "big brother" for extensive soft tissue head and neck defects.

[**Lueg EA**](http://www.ncbi.nlm.nih.gov/sites/entrez?Db=pubmed&Cmd=Search&Term="Lueg EA"%5BAuthor%5D&itool=EntrezSystem2.PEntrez.Pubmed.Pubmed_ResultsPanel.Pubmed_DiscoveryPanel.Pubmed_RVAbstractPlus).

Microvascular Reconstructive Head & Neck Surgery Service, Regional Head, Neck, & Skullbase Surgical Oncology Center, Southern California Permanente Medical Group, Kaiser Foundation Los Angeles Medical Center, 90027, USA. edgar.a.lueg@kp.org

OBJECTIVE: The anterolateral thigh flap has recently been rediscovered in Asia as a perforator flap. The objective of this study was to describe the reliability and donor morbidity of the anterolateral thigh flap for head and neck reconstruction without transmuscular perforator dissection. DESIGN: Consecutive case series by a single surgeon. SETTING: A regional tertiary-referral head, neck, and skull base surgical oncology center. PATIENTS: The first 34 consecutive patients. INTERVENTION: Microvascular reconstruction with an anterolateral thigh free flap. MAIN OUTCOME MEASURES: Primary insufficiency, partial necrosis, complete necrosis, and donor morbidity rates. RESULTS: Two flaps necrosed partially (6%). No flaps demonstrated primary insufficiency, necrosed completely, or incurred significant donor morbidity. CONCLUSIONS: The anterolateral thigh flap can be reliably harvested without transmuscular perforator dissection and without incurring serious donor morbidity. It possesses workhorse attributes (no repositioning, remote from defect, long pedicle) and is extremely versatile (one is able to independently tailor the skin and muscle), making it ideal for the heterogeneous group of extensive soft tissue head and neck defects. When a forearm flap will likely be too thin or too morbid, the anterolateral thigh flap can be considered its "big brother."

PMID: 15262756 [PubMed - indexed for MEDLINE]

[Plast Reconstr Surg.](javascript:AL_get(this, 'jour', 'Plast Reconstr Surg.');) 2004 Dec;114(7):1704-10.[
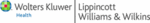
](http://www.ncbi.nlm.nih.gov/entrez/utils/fref.fcgi?PrId=3159&itool=AbstractPlus-def&uid=15577337&db=pubmed&url=http://meta.wkhealth.com/pt/pt-core/template-journal/lwwgateway/media/landingpage.htm?issn=0032-1052&volume=114&issue=7&spage=1704)
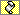
[Links](javascript:PopUpMenu2_Set(Menu15577337);)

## Comparison of the radial forearm flap and the thinned anterolateral thigh cutaneous flap for reconstruction of tongue defects: an evaluation of donor-site morbidity.

[**Huang CH**](http://www.ncbi.nlm.nih.gov/sites/entrez?Db=pubmed&Cmd=Search&Term="Huang CH"%5BAuthor%5D&itool=EntrezSystem2.PEntrez.Pubmed.Pubmed_ResultsPanel.Pubmed_DiscoveryPanel.Pubmed_RVAbstractPlus), [**Chen HC**](http://www.ncbi.nlm.nih.gov/sites/entrez?Db=pubmed&Cmd=Search&Term="Chen HC"%5BAuthor%5D&itool=EntrezSystem2.PEntrez.Pubmed.Pubmed_ResultsPanel.Pubmed_DiscoveryPanel.Pubmed_RVAbstractPlus), [**Huang YL**](http://www.ncbi.nlm.nih.gov/sites/entrez?Db=pubmed&Cmd=Search&Term="Huang YL"%5BAuthor%5D&itool=EntrezSystem2.PEntrez.Pubmed.Pubmed_ResultsPanel.Pubmed_DiscoveryPanel.Pubmed_RVAbstractPlus), [**Mardini S**](http://www.ncbi.nlm.nih.gov/sites/entrez?Db=pubmed&Cmd=Search&Term="Mardini S"%5BAuthor%5D&itool=EntrezSystem2.PEntrez.Pubmed.Pubmed_ResultsPanel.Pubmed_DiscoveryPanel.Pubmed_RVAbstractPlus), [**Feng GM**](http://www.ncbi.nlm.nih.gov/sites/entrez?Db=pubmed&Cmd=Search&Term="Feng GM"%5BAuthor%5D&itool=EntrezSystem2.PEntrez.Pubmed.Pubmed_ResultsPanel.Pubmed_DiscoveryPanel.Pubmed_RVAbstractPlus).

Department of Plastic and Reconstructive Surgery, Chang Gung Memorial Hospital, Taipei, Taiwan. phoebe@ha.mc.ntu.edu.tw

The radial forearm flap is commonly used for reconstruction of tongue defects following tumor extirpation. This flap is easy to harvest and offers thin tissue with large-caliber vessels. However, its use leaves behind a conspicuous aesthetic deformity in the forearm and requires the sacrifice of a major artery of that limb, the radial artery. The anterolateral thigh cutaneous flap has found clinical applications in the reconstruction of soft-tissue defects requiring thin tissue. More recently, in a thinned form, the anterolateral thigh flap has been used for reconstructing defects of the tongue with functional results equivalent to that of the radial forearm flap. For the reconstruction of tongue defects, these two flaps could provide similar soft-tissue coverage, but they seem to result in different donor-site appearances. The donor site is closed primarily, leaving only a linear scar that is inconspicuous with normal clothing, and no functional deficit is left behind in the thigh. Thus, for the supply of flaps for tongue defects, a comparison between the radial forearm flap and the anterolateral thigh flap donor sites is provided in this study. Between December of 2000 and August of 2002, 41 patients who underwent reconstruction of defects of the tongue using either a radial forearm flap or an anterolateral thigh flap were evaluated. The focus was on the evaluation of the functional and aesthetic outcome of the donor site after harvesting these flaps for the purpose of reconstructing either total or partial tongue defects. Finally, a comparison was performed between the donor sites of the two flaps. The disadvantages of the radial forearm flap include the conspicuous unattractive scar in the forearm region, pain, numbness, and the sacrifice of a major artery of the limb. In some patients, the donor-site scar of the forearm acted as a social stigma, preventing these patients from leading a normal life. In contrast, the anterolateral thigh cutaneous flap, after thinning, achieved the same results in reconstructing defects of the tongue without the associated donor-site morbidity. Most importantly, the donor site in the thigh could be closed primarily in almost all patients without any functional deficit. The thinned anterolateral thigh cutaneous flap is a viable substitute for the radial forearm flap when reconstructing defects of the tongue. The results achieved are similar to those of the radial forearm flap, and the donor-site morbidity is significantly decreased.

PMID: 15577337 [PubMed - indexed for MEDLINE]

[J Plast Reconstr Aesthet Surg.](javascript:AL_get(this, 'jour', 'J Plast Reconstr Aesthet Surg.');) 2007;60(6):583-7. Epub 2007 Jan 24.[
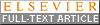
](http://www.ncbi.nlm.nih.gov/entrez/utils/fref.fcgi?PrId=3048&itool=AbstractPlus-def&uid=17485044&db=pubmed&url=http://linkinghub.elsevier.com/retrieve/pii/S1748-6815(06)00612-7)
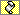
[Links](javascript:PopUpMenu2_Set(Menu17485044);)

## Free anterolateral thigh flap versus free forearm flap: Functional results in oral reconstruction.

[**Farace F**](http://www.ncbi.nlm.nih.gov/sites/entrez?Db=pubmed&Cmd=Search&Term="Farace F"%5BAuthor%5D&itool=EntrezSystem2.PEntrez.Pubmed.Pubmed_ResultsPanel.Pubmed_DiscoveryPanel.Pubmed_RVAbstractPlus), [**Fois VE**](http://www.ncbi.nlm.nih.gov/sites/entrez?Db=pubmed&Cmd=Search&Term="Fois VE"%5BAuthor%5D&itool=EntrezSystem2.PEntrez.Pubmed.Pubmed_ResultsPanel.Pubmed_DiscoveryPanel.Pubmed_RVAbstractPlus), [**Manconi A**](http://www.ncbi.nlm.nih.gov/sites/entrez?Db=pubmed&Cmd=Search&Term="Manconi A"%5BAuthor%5D&itool=EntrezSystem2.PEntrez.Pubmed.Pubmed_ResultsPanel.Pubmed_DiscoveryPanel.Pubmed_RVAbstractPlus), [**Puddu A**](http://www.ncbi.nlm.nih.gov/sites/entrez?Db=pubmed&Cmd=Search&Term="Puddu A"%5BAuthor%5D&itool=EntrezSystem2.PEntrez.Pubmed.Pubmed_ResultsPanel.Pubmed_DiscoveryPanel.Pubmed_RVAbstractPlus), [**Stomeo F**](http://www.ncbi.nlm.nih.gov/sites/entrez?Db=pubmed&Cmd=Search&Term="Stomeo F"%5BAuthor%5D&itool=EntrezSystem2.PEntrez.Pubmed.Pubmed_ResultsPanel.Pubmed_DiscoveryPanel.Pubmed_RVAbstractPlus), [**Tullio A**](http://www.ncbi.nlm.nih.gov/sites/entrez?Db=pubmed&Cmd=Search&Term="Tullio A"%5BAuthor%5D&itool=EntrezSystem2.PEntrez.Pubmed.Pubmed_ResultsPanel.Pubmed_DiscoveryPanel.Pubmed_RVAbstractPlus), [**Meloni F**](http://www.ncbi.nlm.nih.gov/sites/entrez?Db=pubmed&Cmd=Search&Term="Meloni F"%5BAuthor%5D&itool=EntrezSystem2.PEntrez.Pubmed.Pubmed_ResultsPanel.Pubmed_DiscoveryPanel.Pubmed_RVAbstractPlus), [**Pisanu G**](http://www.ncbi.nlm.nih.gov/sites/entrez?Db=pubmed&Cmd=Search&Term="Pisanu G"%5BAuthor%5D&itool=EntrezSystem2.PEntrez.Pubmed.Pubmed_ResultsPanel.Pubmed_DiscoveryPanel.Pubmed_RVAbstractPlus), [**Rubino C**](http://www.ncbi.nlm.nih.gov/sites/entrez?Db=pubmed&Cmd=Search&Term="Rubino C"%5BAuthor%5D&itool=EntrezSystem2.PEntrez.Pubmed.Pubmed_ResultsPanel.Pubmed_DiscoveryPanel.Pubmed_RVAbstractPlus).

Plastic Surgery-Burn Unit Department, University of Sassari, V le S Pietro, Sassari, Italy. farace@uniss.it

Nowadays, microsurgery performed for oral reconstruction of cancer patients, has become the standard treatment in restoring oral functions. The free radial forearm flap (FRFF) is still apparently the first reconstructive choice in oral cavity cancers. Recently the anterolateral thigh flap (ALTF) seemed to challenge the superiority of FRFF. The lack of functional data on which to base this recent supposition is the reason for this new research. Twenty reconstructed patients were enrolled for this study. Speech, swallowing, and donor site complications were studied to assess differences between the two techniques. Results show that difference in function between ALTF and FRFF groups is statistically insignificant. Donor site risks and complications seem to be the only variables among groups. These variables may be used as indicators when making a surgical choice.

PMID: 17485044 [PubMed - indexed for MEDLINE]

[Microsurgery.](javascript:AL_get(this, 'jour', 'Microsurgery.');) 2007;27(8):651-4.[
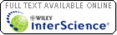
](http://www.ncbi.nlm.nih.gov/entrez/utils/fref.fcgi?PrId=3058&itool=AbstractPlus-def&uid=17929262&db=pubmed&url=http://dx.doi.org/10.1002/micr.20425)
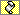
[Links](javascript:PopUpMenu2_Set(Menu17929262);)

## Comparison of anterolateral thigh and radial forearm free flap donor site morbidity.

[**Novak CB**](http://www.ncbi.nlm.nih.gov/sites/entrez?Db=pubmed&Cmd=Search&Term="Novak CB"%5BAuthor%5D&itool=EntrezSystem2.PEntrez.Pubmed.Pubmed_ResultsPanel.Pubmed_DiscoveryPanel.Pubmed_RVAbstractPlus), [**Lipa JE**](http://www.ncbi.nlm.nih.gov/sites/entrez?Db=pubmed&Cmd=Search&Term="Lipa JE"%5BAuthor%5D&itool=EntrezSystem2.PEntrez.Pubmed.Pubmed_ResultsPanel.Pubmed_DiscoveryPanel.Pubmed_RVAbstractPlus), [**Noria S**](http://www.ncbi.nlm.nih.gov/sites/entrez?Db=pubmed&Cmd=Search&Term="Noria S"%5BAuthor%5D&itool=EntrezSystem2.PEntrez.Pubmed.Pubmed_ResultsPanel.Pubmed_DiscoveryPanel.Pubmed_RVAbstractPlus), [**Allison K**](http://www.ncbi.nlm.nih.gov/sites/entrez?Db=pubmed&Cmd=Search&Term="Allison K"%5BAuthor%5D&itool=EntrezSystem2.PEntrez.Pubmed.Pubmed_ResultsPanel.Pubmed_DiscoveryPanel.Pubmed_RVAbstractPlus), [**Neligan PC**](http://www.ncbi.nlm.nih.gov/sites/entrez?Db=pubmed&Cmd=Search&Term="Neligan PC"%5BAuthor%5D&itool=EntrezSystem2.PEntrez.Pubmed.Pubmed_ResultsPanel.Pubmed_DiscoveryPanel.Pubmed_RVAbstractPlus), [**Gilbert RW**](http://www.ncbi.nlm.nih.gov/sites/entrez?Db=pubmed&Cmd=Search&Term="Gilbert RW"%5BAuthor%5D&itool=EntrezSystem2.PEntrez.Pubmed.Pubmed_ResultsPanel.Pubmed_DiscoveryPanel.Pubmed_RVAbstractPlus).

Wharton Head and Neck Centre, University Health Network, Toronto, ON, Canada.

This study evaluated patient-reported outcome of the donor site in patients following head and neck cancer reconstruction. Patients who had undergone cancer reconstruction using either an anterolateral thigh or a radial forearm free flap and who were at least 6 months postsurgery were included and contacted by telephone. There were 37 patients (mean age 61 years, standard deviation 16 years) with 18 anterolateral thigh flaps and 19 radial forearm flaps. The majority of patients were not bothered by scar appearance, light touch, numbness or pain. Significantly more females (P = 0.038) and more patients with radial forearm flaps (P = 0.045) were bothered by the cold at the donor site and more females reported that the shape of the operated extremity was different (P = 0.009). Donor site morbidity is not significant following a radial forearm or anterolateral thigh free flap and the reconstruction should be based upon individual patient factors and surgeon expertise.

PMID: 17929262 [PubMed - indexed for MEDLINE]

[Plast Reconstr Surg.](javascript:AL_get(this, 'jour', 'Plast Reconstr Surg.');) 1998 Oct;102(5):1517-23.[
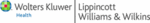
](http://www.ncbi.nlm.nih.gov/entrez/utils/fref.fcgi?PrId=3159&itool=AbstractPlus-def&uid=9774005&db=pubmed&url=http://meta.wkhealth.com/pt/pt-core/template-journal/lwwgateway/media/landingpage.htm?issn=0032-1052&volume=102&issue=5&spage=1517)
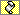
[Links](javascript:PopUpMenu2_Set(Menu9774005);)

## Anatomic variations and technical problems of the anterolateral thigh flap: a report of 74 cases.

[**Kimata Y**](http://www.ncbi.nlm.nih.gov/sites/entrez?Db=pubmed&Cmd=Search&Term="Kimata Y"%5BAuthor%5D&itool=EntrezSystem2.PEntrez.Pubmed.Pubmed_ResultsPanel.Pubmed_DiscoveryPanel.Pubmed_RVAbstractPlus), [**Uchiyama K**](http://www.ncbi.nlm.nih.gov/sites/entrez?Db=pubmed&Cmd=Search&Term="Uchiyama K"%5BAuthor%5D&itool=EntrezSystem2.PEntrez.Pubmed.Pubmed_ResultsPanel.Pubmed_DiscoveryPanel.Pubmed_RVAbstractPlus), [**Ebihara S**](http://www.ncbi.nlm.nih.gov/sites/entrez?Db=pubmed&Cmd=Search&Term="Ebihara S"%5BAuthor%5D&itool=EntrezSystem2.PEntrez.Pubmed.Pubmed_ResultsPanel.Pubmed_DiscoveryPanel.Pubmed_RVAbstractPlus), [**Nakatsuka T**](http://www.ncbi.nlm.nih.gov/sites/entrez?Db=pubmed&Cmd=Search&Term="Nakatsuka T"%5BAuthor%5D&itool=EntrezSystem2.PEntrez.Pubmed.Pubmed_ResultsPanel.Pubmed_DiscoveryPanel.Pubmed_RVAbstractPlus), [**Harii K**](http://www.ncbi.nlm.nih.gov/sites/entrez?Db=pubmed&Cmd=Search&Term="Harii K"%5BAuthor%5D&itool=EntrezSystem2.PEntrez.Pubmed.Pubmed_ResultsPanel.Pubmed_DiscoveryPanel.Pubmed_RVAbstractPlus).

Division of Plastic and Reconstructive Surgery, National Cancer Center Hospital East, Kashiwa, Chiba, Japan.

We have transferred 74 free or pedicled anterolateral thigh flaps, including those combined with other flaps, for reconstruction of various types of defects. We report several anatomic variations of the lateral circumflex arterial system and discuss some technical problems with this flap. Septocutaneous perforators were found in 28 of 74 cases (37.8 percent), and no perforators were found in 4 cases (5.4 percent). In the 70 cases with perforators, 171 tiny cutaneous perforators (an average of 2.31 per case) were found. Musculocutaneous perforators (81.9 percent) were much more common than septocutaneous perforators (18.1 percent). Perforators were concentrated near the midpoint of the lateral thigh, and the selection of perforators as nutrient vessels for the anterolateral thigh flap was related to the length of the pedicle and the thickness of the skin flap. Anatomic variations of the branching pattern of perforators were classified into eight types. Flaps with perforators that arise directly from the profunda femoris artery are difficult to combine with other free flaps. Because the perforators are extremely small and tend to thrombose soon after congestion develops, these flaps are difficult to salvage with recirculation surgery. Therefore, several perforators should be included with the flap, if possible. The descending artery of the lateral circumflex femoral artery was always accompanied by two veins with different back-flow strengths. Therefore, veins for microsurgical anastomosis must be chosen carefully. Because it is nourished by several perforators arising from the descending artery, the vastus lateralis muscle can be combined with the anterolateral thigh flap. However, splitting the muscle longitudinally without harvesting its blood supply is complicated because its fibers are oblique. The rectus femoris muscle can also be combined with the anterolateral thigh flap, but its pedicle is short and its origin is very near the site of anastomosis. When the anterolateral thigh flap is combined with the tensor fasciae latae musculocutaneous flap, the large skin area of the lateral part of thigh can be transferred to repair the massive defects. The anterolateral thigh flap has many advantages and can be used to reconstruct many types of defect. However, anatomic variations must be considered if the flap is to be used safely and reliably.

PMID: 9774005 [PubMed - indexed for MEDLINE]

[Br J Oral Maxillofac Surg.](javascript:AL_get(this, 'jour', 'Br J Oral Maxillofac Surg.');) 2007 Nov 7 [Epub ahead of print][
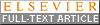
](http://www.ncbi.nlm.nih.gov/entrez/utils/fref.fcgi?PrId=3048&itool=AbstractPlus-def&uid=17996341&db=pubmed&url=http://linkinghub.elsevier.com/retrieve/pii/S0266-4356(07)00448-2)
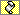
[Links](javascript:PopUpMenu2_Set(Menu17996341);)

## Rescue of anterolateral thigh flap with absent perforators using anteromedial thigh flap.

[**Katre C**](http://www.ncbi.nlm.nih.gov/sites/entrez?Db=pubmed&Cmd=Search&Term="Katre C"%5BAuthor%5D&itool=EntrezSystem2.PEntrez.Pubmed.Pubmed_ResultsPanel.Pubmed_DiscoveryPanel.Pubmed_RVAbstractPlus), [**Shaw R**](http://www.ncbi.nlm.nih.gov/sites/entrez?Db=pubmed&Cmd=Search&Term="Shaw R"%5BAuthor%5D&itool=EntrezSystem2.PEntrez.Pubmed.Pubmed_ResultsPanel.Pubmed_DiscoveryPanel.Pubmed_RVAbstractPlus), [**Batstone M**](http://www.ncbi.nlm.nih.gov/sites/entrez?Db=pubmed&Cmd=Search&Term="Batstone M"%5BAuthor%5D&itool=EntrezSystem2.PEntrez.Pubmed.Pubmed_ResultsPanel.Pubmed_DiscoveryPanel.Pubmed_RVAbstractPlus), [**Brown J**](http://www.ncbi.nlm.nih.gov/sites/entrez?Db=pubmed&Cmd=Search&Term="Brown J"%5BAuthor%5D&itool=EntrezSystem2.PEntrez.Pubmed.Pubmed_ResultsPanel.Pubmed_DiscoveryPanel.Pubmed_RVAbstractPlus).

Regional Maxillofacial Unit, University Hospital Aintree, Lower Lane, Liverpool L9 7AL, United Kingdom.

PMID: 17996341 [PubMed - as supplied by publisher]

[Plast Reconstr Surg.](javascript:AL_get(this, 'jour', 'Plast Reconstr Surg.');) 2000 Jun;105(7):2349-57; discussion 2358-60.[
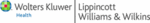
](http://www.ncbi.nlm.nih.gov/entrez/utils/fref.fcgi?PrId=3159&itool=AbstractPlus-def&uid=10845286&db=pubmed&url=http://meta.wkhealth.com/pt/pt-core/template-journal/lwwgateway/media/landingpage.htm?issn=0032-1052&volume=105&issue=7&spage=2349)
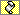
[Links](javascript:PopUpMenu2_Set(Menu10845286);)

## Free anterolateral thigh flap for reconstruction of head and neck defects following cancer ablation.

[**Shieh SJ**](http://www.ncbi.nlm.nih.gov/sites/entrez?Db=pubmed&Cmd=Search&Term="Shieh SJ"%5BAuthor%5D&itool=EntrezSystem2.PEntrez.Pubmed.Pubmed_ResultsPanel.Pubmed_DiscoveryPanel.Pubmed_RVAbstractPlus), [**Chiu HY**](http://www.ncbi.nlm.nih.gov/sites/entrez?Db=pubmed&Cmd=Search&Term="Chiu HY"%5BAuthor%5D&itool=EntrezSystem2.PEntrez.Pubmed.Pubmed_ResultsPanel.Pubmed_DiscoveryPanel.Pubmed_RVAbstractPlus), [**Yu JC**](http://www.ncbi.nlm.nih.gov/sites/entrez?Db=pubmed&Cmd=Search&Term="Yu JC"%5BAuthor%5D&itool=EntrezSystem2.PEntrez.Pubmed.Pubmed_ResultsPanel.Pubmed_DiscoveryPanel.Pubmed_RVAbstractPlus), [**Pan SC**](http://www.ncbi.nlm.nih.gov/sites/entrez?Db=pubmed&Cmd=Search&Term="Pan SC"%5BAuthor%5D&itool=EntrezSystem2.PEntrez.Pubmed.Pubmed_ResultsPanel.Pubmed_DiscoveryPanel.Pubmed_RVAbstractPlus), [**Tsai ST**](http://www.ncbi.nlm.nih.gov/sites/entrez?Db=pubmed&Cmd=Search&Term="Tsai ST"%5BAuthor%5D&itool=EntrezSystem2.PEntrez.Pubmed.Pubmed_ResultsPanel.Pubmed_DiscoveryPanel.Pubmed_RVAbstractPlus), [**Shen CL**](http://www.ncbi.nlm.nih.gov/sites/entrez?Db=pubmed&Cmd=Search&Term="Shen CL"%5BAuthor%5D&itool=EntrezSystem2.PEntrez.Pubmed.Pubmed_ResultsPanel.Pubmed_DiscoveryPanel.Pubmed_RVAbstractPlus).

Department of Surgery, National Cheng-Kung University Hospital and Medical College, Tainan, Taiwan. sjshieh@mail.ncku.edu.tw

Thirty-seven consecutive free anterolateral thigh flaps in 36 patients were transferred for reconstruction of head and neck defects following cancer ablation between January of 1997 and June of 1998. The success rate was 97 percent (36 of 37), with one flap lost due to a twisted perforator. The anatomic variations and length of the vascular pedicle were investigated to obtain better knowledge of anatomy and to avoid several surgical pitfalls when it is used for head and neck reconstruction. The cutaneous perforators were always found and presented as musculocutaneous or septocutaneous perforators in this series of 37 anterolateral thigh flaps. They were classified into four types according to the perforator derivation and the direction in which it traversed the vastus lateralis muscle. In type I, vertical musculocutaneous perforators from the descending branch of the lateral circumflex femoral artery were found in 56.8 percent of cases (21 of 37), and they were 4.83 +/- 2.04 cm in length. In type II, horizontal musculocutaneous perforators from the transverse branch of the lateral circumflex femoral artery were found in 27.0 percent of cases (10 of 37), and they were 6.77 +/- 3.48 cm in length. In type III, vertical septocutaneous perforators from the descending branch of the lateral circumflex femoral artery were found in 10.8 percent of cases (4 of 37), and they were 3.60 +/- 1.47 cm in length. In type IV, horizontal septocutaneous perforators from the transverse branch of the lateral circumflex femoral artery were found in 5.4 percent of cases (2 of 37). They were 7.75 +/- 1.06 cm in length. The average length of vascular pedicle was 12.01 +/- 1.50 cm, and the arterial diameter was around 2.0 to 2.5 mm; two accompanying veins varied from 1.8 to 3.0 mm and were suitable for anastomosis with the neck vessels. Reconstruction of one-layer defect, external skin or intraoral lining, was carried out in 18 cases, through-and-through defect in 17 cases, and composite mandibular defect in two cases. With increasing knowledge of anatomy and refinements of surgical technique, the anterolateral thigh flap can be harvested safely to reconstruct complicated defects of head and neck following cancer ablation with only minimal donor-site morbidity.

PMID: 10845286 [PubMed - indexed for MEDLINE]

[Laryngorhinootologie.](javascript:AL_get(this, 'jour', 'Laryngorhinootologie.');) 1997 Mar;76(3):162-8.
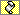
[Links](javascript:PopUpMenu2_Set(Menu9213405);)

## [Clinical comparison between radial and lateral forearm flap]

[Article in German]

[**Gehrking E**](http://www.ncbi.nlm.nih.gov/sites/entrez?Db=pubmed&Cmd=Search&Term="Gehrking E"%5BAuthor%5D&itool=EntrezSystem2.PEntrez.Pubmed.Pubmed_ResultsPanel.Pubmed_DiscoveryPanel.Pubmed_RVAbstractPlus), [**Remmert S**](http://www.ncbi.nlm.nih.gov/sites/entrez?Db=pubmed&Cmd=Search&Term="Remmert S"%5BAuthor%5D&itool=EntrezSystem2.PEntrez.Pubmed.Pubmed_ResultsPanel.Pubmed_DiscoveryPanel.Pubmed_RVAbstractPlus), [**Krappen S**](http://www.ncbi.nlm.nih.gov/sites/entrez?Db=pubmed&Cmd=Search&Term="Krappen S"%5BAuthor%5D&itool=EntrezSystem2.PEntrez.Pubmed.Pubmed_ResultsPanel.Pubmed_DiscoveryPanel.Pubmed_RVAbstractPlus), [**Sommer K**](http://www.ncbi.nlm.nih.gov/sites/entrez?Db=pubmed&Cmd=Search&Term="Sommer K"%5BAuthor%5D&itool=EntrezSystem2.PEntrez.Pubmed.Pubmed_ResultsPanel.Pubmed_DiscoveryPanel.Pubmed_RVAbstractPlus).

Klinik für Hals-, Nasen- und Ohrenheilkunde, Medizinischen Universität zu Lübeck.

BACKGROUND: Free fasciocutaneous flap transplantation is a versatile method for soft tissue reconstruction. This clinical study points out differences between the radial forearm flap and the lateral arm flap. METHODS: We used the radial forearm flap in 36 patients following tumor ablation and in 11 patients we used the lateral arm flap for soft tissue reconstruction. We studied the arterial and venous vessel calibers of the flaps, the vessel pedicle length, and the size of the skin paddle. Motor and sensory function tests of the upper/ lower arm and hand were performed after surgery. Recipient and donor site morbidity was noted. RESULTS: Compared to the forearm flap the lateral arm flap is bulky (1-5 cm vs. 0.5-1.5 cm), its vessel calibers are smaller (Art.: 1.4 vs. 1.8 mm, Ven.: 1.8 vs. 2.0 mm), flap size and maximum vessel pedicle length (10 vs. 12 cm) are equal. Raising the lateral arm flap is more demanding and needs more time due to the deep location of the vessel pedicle and the accompanying radial nerve within the intermuscular septum. On the other hand the lateral arm flap is advantageous because of primary wound closure of the donor site. The donor site of the forearm flap had to be covered with skin graft in all cases. We found sensory deficits of the proximal lower arm in 50% after dissection of the lateral arm flap and in 14% on the distal lower arm and thumb joint after dissection of the radial forearm flap. CONCLUSIONS: Both transplants are fasciocutaneous and optional innervated, they offer a constant anatomy and can be harvested simultaneously without interference to the head and neck team. Because of the specific characteristics of these flaps we prefer the radial forearm flap for soft tissue reconstruction. We use the lateral upper arm flap, if a forearm flap cannot be harvested, for head or neck augmentation and for reconstruction of large and deep defects.

PMID: 9213405 [PubMed - indexed for MEDLINE]

[Arch Otolaryngol Head Neck Surg.](javascript:AL_get(this, 'jour', 'Arch Otolaryngol Head Neck Surg.');) 1997 Dec;123(12):1325-31.
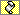
[Links](javascript:PopUpMenu2_Set(Menu9413362);)

## Versatility of the free anterolateral thigh flap for reconstruction of head and neck defects.

[**Kimata Y**](http://www.ncbi.nlm.nih.gov/sites/entrez?Db=pubmed&Cmd=Search&Term="Kimata Y"%5BAuthor%5D&itool=EntrezSystem2.PEntrez.Pubmed.Pubmed_ResultsPanel.Pubmed_DiscoveryPanel.Pubmed_RVAbstractPlus), [**Uchiyama K**](http://www.ncbi.nlm.nih.gov/sites/entrez?Db=pubmed&Cmd=Search&Term="Uchiyama K"%5BAuthor%5D&itool=EntrezSystem2.PEntrez.Pubmed.Pubmed_ResultsPanel.Pubmed_DiscoveryPanel.Pubmed_RVAbstractPlus), [**Ebihara S**](http://www.ncbi.nlm.nih.gov/sites/entrez?Db=pubmed&Cmd=Search&Term="Ebihara S"%5BAuthor%5D&itool=EntrezSystem2.PEntrez.Pubmed.Pubmed_ResultsPanel.Pubmed_DiscoveryPanel.Pubmed_RVAbstractPlus), [**Yoshizumi T**](http://www.ncbi.nlm.nih.gov/sites/entrez?Db=pubmed&Cmd=Search&Term="Yoshizumi T"%5BAuthor%5D&itool=EntrezSystem2.PEntrez.Pubmed.Pubmed_ResultsPanel.Pubmed_DiscoveryPanel.Pubmed_RVAbstractPlus), [**Asai M**](http://www.ncbi.nlm.nih.gov/sites/entrez?Db=pubmed&Cmd=Search&Term="Asai M"%5BAuthor%5D&itool=EntrezSystem2.PEntrez.Pubmed.Pubmed_ResultsPanel.Pubmed_DiscoveryPanel.Pubmed_RVAbstractPlus), [**Saikawa M**](http://www.ncbi.nlm.nih.gov/sites/entrez?Db=pubmed&Cmd=Search&Term="Saikawa M"%5BAuthor%5D&itool=EntrezSystem2.PEntrez.Pubmed.Pubmed_ResultsPanel.Pubmed_DiscoveryPanel.Pubmed_RVAbstractPlus), [**Hayashi R**](http://www.ncbi.nlm.nih.gov/sites/entrez?Db=pubmed&Cmd=Search&Term="Hayashi R"%5BAuthor%5D&itool=EntrezSystem2.PEntrez.Pubmed.Pubmed_ResultsPanel.Pubmed_DiscoveryPanel.Pubmed_RVAbstractPlus), [**Jitsuiki Y**](http://www.ncbi.nlm.nih.gov/sites/entrez?Db=pubmed&Cmd=Search&Term="Jitsuiki Y"%5BAuthor%5D&itool=EntrezSystem2.PEntrez.Pubmed.Pubmed_ResultsPanel.Pubmed_DiscoveryPanel.Pubmed_RVAbstractPlus), [**Majima K**](http://www.ncbi.nlm.nih.gov/sites/entrez?Db=pubmed&Cmd=Search&Term="Majima K"%5BAuthor%5D&itool=EntrezSystem2.PEntrez.Pubmed.Pubmed_ResultsPanel.Pubmed_DiscoveryPanel.Pubmed_RVAbstractPlus), [**Ohyama W**](http://www.ncbi.nlm.nih.gov/sites/entrez?Db=pubmed&Cmd=Search&Term="Ohyama W"%5BAuthor%5D&itool=EntrezSystem2.PEntrez.Pubmed.Pubmed_ResultsPanel.Pubmed_DiscoveryPanel.Pubmed_RVAbstractPlus), [**Haneda T**](http://www.ncbi.nlm.nih.gov/sites/entrez?Db=pubmed&Cmd=Search&Term="Haneda T"%5BAuthor%5D&itool=EntrezSystem2.PEntrez.Pubmed.Pubmed_ResultsPanel.Pubmed_DiscoveryPanel.Pubmed_RVAbstractPlus), [**Nakatsuka T**](http://www.ncbi.nlm.nih.gov/sites/entrez?Db=pubmed&Cmd=Search&Term="Nakatsuka T"%5BAuthor%5D&itool=EntrezSystem2.PEntrez.Pubmed.Pubmed_ResultsPanel.Pubmed_DiscoveryPanel.Pubmed_RVAbstractPlus), [**Harii K**](http://www.ncbi.nlm.nih.gov/sites/entrez?Db=pubmed&Cmd=Search&Term="Harii K"%5BAuthor%5D&itool=EntrezSystem2.PEntrez.Pubmed.Pubmed_ResultsPanel.Pubmed_DiscoveryPanel.Pubmed_RVAbstractPlus).

Department of Plastic and Reconstructive Surgery, National Cancer Center Hospital East, Chiba, Japan.

OBJECTIVE: The anterolateral thigh flap has many advantages in head and neck reconstruction. However, it has not yet come into widespread use because of the anatomic variations of its perforators. Herein, we describe a safe operative technique related to the patterns of the perforators and discuss its wide versatility. SETTING: A national cancer center hospital. PATIENTS: Thirty-eight anterolateral thigh flaps were transferred. Confirmation and dissection of the flap pedicle were simultaneously performed with tumor resection. The design and elevation of the flap were carried out immediately after the tumor resection was completed. RESULTS: From the study of the anatomic variations of the perforators, septocutaneous patterns were recognized in 10 cases (26.3%) and musculocutaneous patterns in 28 cases (73.7%). All flaps were easily and safely elevated with our techniques. Thirty-six flaps survived. Partial necrosis was noted owing to excessive thinning procedure in one patient and total necrosis was noted owing to venous thrombosis at the anastomosis part in another patient. CONCLUSIONS: We found that the anterolateral thigh flap has numerous advantages. It is possible to perform the flap elevation and the tumor resection simultaneously. The flap is generally thin and is suitable for reconstruction of intraoral defects. Combined flaps with neighboring tissues and other, distant flaps can be used. Furthermore, since our technique minimizes the problems of confirmation and dissection of the perforators, we conclude that this flap can be successfully used to repair a variety of large defects of the head and neck.

PMID: 9413362 [PubMed - indexed for MEDLINE]

[Plast Reconstr Surg.](javascript:AL_get(this, 'jour', 'Plast Reconstr Surg.');) 2002 Jul;110(1):82-8.[
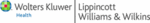
](http://www.ncbi.nlm.nih.gov/entrez/utils/fref.fcgi?PrId=3159&itool=AbstractPlus-def&uid=12087235&db=pubmed&url=http://meta.wkhealth.com/pt/pt-core/template-journal/lwwgateway/media/landingpage.htm?issn=0032-1052&volume=110&issue=1&spage=82)
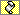
[Links](javascript:PopUpMenu2_Set(Menu12087235);)

## Anterolateral thigh flap for postmastectomy breast reconstruction.

[**Wei FC**](http://www.ncbi.nlm.nih.gov/sites/entrez?Db=pubmed&Cmd=Search&Term="Wei FC"%5BAuthor%5D&itool=EntrezSystem2.PEntrez.Pubmed.Pubmed_ResultsPanel.Pubmed_DiscoveryPanel.Pubmed_RVAbstractPlus), [**Suominen S**](http://www.ncbi.nlm.nih.gov/sites/entrez?Db=pubmed&Cmd=Search&Term="Suominen S"%5BAuthor%5D&itool=EntrezSystem2.PEntrez.Pubmed.Pubmed_ResultsPanel.Pubmed_DiscoveryPanel.Pubmed_RVAbstractPlus), [**Cheng MH**](http://www.ncbi.nlm.nih.gov/sites/entrez?Db=pubmed&Cmd=Search&Term="Cheng MH"%5BAuthor%5D&itool=EntrezSystem2.PEntrez.Pubmed.Pubmed_ResultsPanel.Pubmed_DiscoveryPanel.Pubmed_RVAbstractPlus), [**Celik N**](http://www.ncbi.nlm.nih.gov/sites/entrez?Db=pubmed&Cmd=Search&Term="Celik N"%5BAuthor%5D&itool=EntrezSystem2.PEntrez.Pubmed.Pubmed_ResultsPanel.Pubmed_DiscoveryPanel.Pubmed_RVAbstractPlus), [**Lai YL**](http://www.ncbi.nlm.nih.gov/sites/entrez?Db=pubmed&Cmd=Search&Term="Lai YL"%5BAuthor%5D&itool=EntrezSystem2.PEntrez.Pubmed.Pubmed_ResultsPanel.Pubmed_DiscoveryPanel.Pubmed_RVAbstractPlus).

Department of Plastic and Reconstructive Surgery, Chang Gung Memorial Hospital, 199 Tung Hwa North Road, Taipei, Taiwan. fcw2007@adm.cgmh.org.tw

Most postmastectomy defects are reconstructed by use of lower abdominal-wall tissue either as a pedicled or free flap. However, there are some contraindications for using lower abdominal flaps in breast reconstruction, such as inadequate soft-tissue volume, previous abdominoplasty, lower paramedian or multiple abdominal scars, and plans for future pregnancy. In such situations, a gluteal flap has often been the second choice. However, the quality of the adipose tissue of gluteal flaps is inferior to that of lower abdominal flaps, the pedicle is short, and a two-team approach is not possible because creation of the gluteal flap requires that the patient's position be changed during the operation. In 2000, five cases of breast reconstructions were performed with anterolateral thigh flaps in the authors' institution. Two of them were secondary and three were immediate unilateral breast reconstructions. The mean weight of the specimen removed was 350 g in the three patients who underwent immediate reconstruction, and the mean weight of the entire anterolateral thigh flap was 410 g. Skin islands ranged in size from 4 x 8 cm to 7 x 22 cm, with the underlying fat pad ranging in size from 10 x 12 cm to 14 x 22 cm. The mean pedicle length was 11 cm (range, 7 to 15 cm). All flaps were completely successful, except for one that involved some fat necrosis. The quality of the skin and underlying fat and the pliability of the anterolateral thigh flap are much superior to those of gluteal flaps and are similar to those of lower abdominal flaps. In thin patients, more subcutaneous fat can be harvested by extending the flap under the skin. Use of a thigh flap allows a two-team approach with the patient in a supine position, and no change of patient position is required during the operation. However, the position of the scar may not be acceptable to some patients. Therefore, when an abdominal flap is unavailable or contraindicated, the creation of an anterolateral thigh flap for primary and secondary breast reconstruction is an alternative to the use of lower abdominal and gluteal tissues.

PMID: 12087235 [PubMed - indexed for MEDLINE]

[Oral Surg Oral Med Oral Pathol Oral Radiol Endod.](javascript:AL_get(this, 'jour', 'Oral Surg Oral Med Oral Pathol Oral Radiol Endod.');) 2007 Jul;104(1):29-37. Epub 2007 Jan 2.[
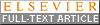
](http://www.ncbi.nlm.nih.gov/entrez/utils/fref.fcgi?PrId=3048&itool=AbstractPlus-def&uid=17197203&db=pubmed&url=http://linkinghub.elsevier.com/retrieve/pii/S1079-2104(06)00778-5)
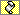
[Links](javascript:PopUpMenu2_Set(Menu17197203);)

## Radial forearm free flap for reconstruction of the oral cavity: clinical experience in 55 cases.

[**González-García R**](http://www.ncbi.nlm.nih.gov/sites/entrez?Db=pubmed&Cmd=Search&Term="González-García R"%5BAuthor%5D&itool=EntrezSystem2.PEntrez.Pubmed.Pubmed_ResultsPanel.Pubmed_DiscoveryPanel.Pubmed_RVAbstractPlus), [**Rodríguez-Campo FJ**](http://www.ncbi.nlm.nih.gov/sites/entrez?Db=pubmed&Cmd=Search&Term="Rodríguez-Campo FJ"%5BAuthor%5D&itool=EntrezSystem2.PEntrez.Pubmed.Pubmed_ResultsPanel.Pubmed_DiscoveryPanel.Pubmed_RVAbstractPlus), [**Naval-Gías L**](http://www.ncbi.nlm.nih.gov/sites/entrez?Db=pubmed&Cmd=Search&Term="Naval-Gías L"%5BAuthor%5D&itool=EntrezSystem2.PEntrez.Pubmed.Pubmed_ResultsPanel.Pubmed_DiscoveryPanel.Pubmed_RVAbstractPlus), [**Sastre-Pérez J**](http://www.ncbi.nlm.nih.gov/sites/entrez?Db=pubmed&Cmd=Search&Term="Sastre-Pérez J"%5BAuthor%5D&itool=EntrezSystem2.PEntrez.Pubmed.Pubmed_ResultsPanel.Pubmed_DiscoveryPanel.Pubmed_RVAbstractPlus), [**Muñoz-Guerra MF**](http://www.ncbi.nlm.nih.gov/sites/entrez?Db=pubmed&Cmd=Search&Term="Muñoz-Guerra MF"%5BAuthor%5D&itool=EntrezSystem2.PEntrez.Pubmed.Pubmed_ResultsPanel.Pubmed_DiscoveryPanel.Pubmed_RVAbstractPlus), [**Usandizaga JL**](http://www.ncbi.nlm.nih.gov/sites/entrez?Db=pubmed&Cmd=Search&Term="Usandizaga JL"%5BAuthor%5D&itool=EntrezSystem2.PEntrez.Pubmed.Pubmed_ResultsPanel.Pubmed_DiscoveryPanel.Pubmed_RVAbstractPlus), [**Díaz-González FJ**](http://www.ncbi.nlm.nih.gov/sites/entrez?Db=pubmed&Cmd=Search&Term="Díaz-González FJ"%5BAuthor%5D&itool=EntrezSystem2.PEntrez.Pubmed.Pubmed_ResultsPanel.Pubmed_DiscoveryPanel.Pubmed_RVAbstractPlus).

Department of Oral and Maxillofacial/Head and Neck Surgery, University Hospital la Princesa, Autonoma University of Madrid, Madrid, Spain. raugg@mixmail.com <raugg@mixmail.com>

OBJECTIVE: Since the advent of modern microvascular techniques, the radial forearm free flap (RFFF) has become a reliable method for reconstruction of defects within the oral cavity. The purpose of the present study was to evaluate our experience with the use of the RFFF for the reconstruction of oral cavity defects after tumor resection. STUDY DESIGN: During a 9-year period, 103 consecutive patients were treated in our department for the reconstruction of oral defects after tumoral ablation by means of microvascularized free flaps. Fifty-five patients were reconstructed by means of the RFFF. Patients were treated for benign (n = 1) and malignant (n = 54) entities. All the patients underwent an abdominal split-thickness skin graft for the closure of the donor site. RESULTS: Fifty-five patients underwent reconstruction by means of the RFFF after resection of the oral cavity. Squamous cell carcinoma was present in 54 patients. A mean age of 55.5 years was observed (range 16-78). Thirty-nine patients (70.9%) were men and 16 (29.1%) women. Primary reconstruction was achieved in 52 patients (96.3%). A fasciocutaneous graft was used in all of the cases, with a mean size of 7.39 x 5.17 cm. The mean flap ischemic time was 56.02 minutes. During the immediate follow-up period, revision of the vascular anastomosis was necessary in 18.9% of the cases owing to flap ischemia. CONCLUSION: Our results revealed that the RFFF is a reliable method for reconstructing a wide range of oral cavity defects with an acceptable low morbidity rate. It provides adequate bulkiness and pliability, resulting in adequate reconstruction of a wide variety of defects within the oral cavity.

PMID: 17197203 [PubMed - indexed for MEDLINE]

[Plast Reconstr Surg.](javascript:AL_get(this, 'jour', 'Plast Reconstr Surg.');) 2002 Jun;109(7):2211-6; discussion 2217-8.[
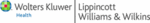
](http://www.ncbi.nlm.nih.gov/entrez/utils/fref.fcgi?PrId=3159&itool=AbstractPlus-def&uid=12045538&db=pubmed&url=http://meta.wkhealth.com/pt/pt-core/template-journal/lwwgateway/media/landingpage.htm?issn=0032-1052&volume=109&issue=7&spage=2211)
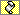
[Links](javascript:PopUpMenu2_Set(Menu12045538);)

## Technique and strategy in anterolateral thigh perforator flap surgery, based on an analysis of 15 complete and partial failures in 439 cases.

[**Celik N**](http://www.ncbi.nlm.nih.gov/sites/entrez?Db=pubmed&Cmd=Search&Term="Celik N"%5BAuthor%5D&itool=EntrezSystem2.PEntrez.Pubmed.Pubmed_ResultsPanel.Pubmed_DiscoveryPanel.Pubmed_RVAbstractPlus), [**Wei FC**](http://www.ncbi.nlm.nih.gov/sites/entrez?Db=pubmed&Cmd=Search&Term="Wei FC"%5BAuthor%5D&itool=EntrezSystem2.PEntrez.Pubmed.Pubmed_ResultsPanel.Pubmed_DiscoveryPanel.Pubmed_RVAbstractPlus), [**Lin CH**](http://www.ncbi.nlm.nih.gov/sites/entrez?Db=pubmed&Cmd=Search&Term="Lin CH"%5BAuthor%5D&itool=EntrezSystem2.PEntrez.Pubmed.Pubmed_ResultsPanel.Pubmed_DiscoveryPanel.Pubmed_RVAbstractPlus), [**Cheng MH**](http://www.ncbi.nlm.nih.gov/sites/entrez?Db=pubmed&Cmd=Search&Term="Cheng MH"%5BAuthor%5D&itool=EntrezSystem2.PEntrez.Pubmed.Pubmed_ResultsPanel.Pubmed_DiscoveryPanel.Pubmed_RVAbstractPlus), [**Chen HC**](http://www.ncbi.nlm.nih.gov/sites/entrez?Db=pubmed&Cmd=Search&Term="Chen HC"%5BAuthor%5D&itool=EntrezSystem2.PEntrez.Pubmed.Pubmed_ResultsPanel.Pubmed_DiscoveryPanel.Pubmed_RVAbstractPlus), [**Jeng SF**](http://www.ncbi.nlm.nih.gov/sites/entrez?Db=pubmed&Cmd=Search&Term="Jeng SF"%5BAuthor%5D&itool=EntrezSystem2.PEntrez.Pubmed.Pubmed_ResultsPanel.Pubmed_DiscoveryPanel.Pubmed_RVAbstractPlus), [**Kuo YR**](http://www.ncbi.nlm.nih.gov/sites/entrez?Db=pubmed&Cmd=Search&Term="Kuo YR"%5BAuthor%5D&itool=EntrezSystem2.PEntrez.Pubmed.Pubmed_ResultsPanel.Pubmed_DiscoveryPanel.Pubmed_RVAbstractPlus).

Department of Plastic and Reconstructive Surgery, Chang Gung Memorial Hospital and Medical College, 199 Tung Hwa North Road, Taipei, Taiwan.

The free anterolateral thigh flap is becoming one of the most preferred options for soft-tissue defect reconstruction. Between June of 1996 and August of 2000, 672 anterolateral thigh flaps were used in 660 patients in Chang Gung Memorial Hospital. A total of 439 flaps were cutaneous or fasciocutaneous flaps based on musculocutaneous perforators. The analysis of the flap failures was done only in this perforator series. In six cases, no suitable skin vessel was found during the dissection of the flaps. The complete success rate was 96.58 percent (424 of 439). Of the 15 failure cases, eight were complete and seven were partial (10 percent to 60 percent of the flap). Thirty-four flaps were reexplored, and 19 (56 percent) were salvaged. In this study, some of the reasons for the flap failure, unique to the anterolateral thigh perforator flap, were identified. They include inadvertent division of perforator at the fascial plane as a result of inadequate knowledge of perforator anatomy, inadvertent injury to the perforator during intramuscular dissection (noted by the surgeon or ignored) as a result of inexperience, and twisting of the pedicle during inset of the flap at the recipient site. Technical pearls in the harvest of the anterolateral thigh perforator flap are as follows: mapping of the skin vessels with a Doppler probe before flap design, meticulous dissection of the perforator under surgical loupe or even lower-magnification microscope, inclusion of a small fascia cuff around the perforator, and intermittent topical use of Xylocaine during the intramuscular dissection of the perforators. During reexploration, one must search for twisting of the pedicle and small bleeders from the branches of the intramuscular perforators.

PMID: 12045538 [PubMed - indexed for MEDLINE]

[Br J Oral Maxillofac Surg.](javascript:AL_get(this, 'jour', 'Br J Oral Maxillofac Surg.');) 2005 Jun;43(3):199-204.[
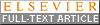
](http://www.ncbi.nlm.nih.gov/entrez/utils/fref.fcgi?PrId=3048&itool=AbstractPlus-def&uid=15888352&db=pubmed&url=http://linkinghub.elsevier.com/retrieve/pii/S0266-4356(04)00237-2)
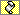
[Links](javascript:PopUpMenu2_Set(Menu15888352);)

## Clinical outcome and technical aspects of 263 radial forearm free flaps used in reconstruction of the oral cavity.

[**Smith GI**](http://www.ncbi.nlm.nih.gov/sites/entrez?Db=pubmed&Cmd=Search&Term="Smith GI"%5BAuthor%5D&itool=EntrezSystem2.PEntrez.Pubmed.Pubmed_ResultsPanel.Pubmed_DiscoveryPanel.Pubmed_RVAbstractPlus), [**O'Brien CJ**](http://www.ncbi.nlm.nih.gov/sites/entrez?Db=pubmed&Cmd=Search&Term="O'Brien CJ"%5BAuthor%5D&itool=EntrezSystem2.PEntrez.Pubmed.Pubmed_ResultsPanel.Pubmed_DiscoveryPanel.Pubmed_RVAbstractPlus), [**Choy ET**](http://www.ncbi.nlm.nih.gov/sites/entrez?Db=pubmed&Cmd=Search&Term="Choy ET"%5BAuthor%5D&itool=EntrezSystem2.PEntrez.Pubmed.Pubmed_ResultsPanel.Pubmed_DiscoveryPanel.Pubmed_RVAbstractPlus), [**Andruchow JL**](http://www.ncbi.nlm.nih.gov/sites/entrez?Db=pubmed&Cmd=Search&Term="Andruchow JL"%5BAuthor%5D&itool=EntrezSystem2.PEntrez.Pubmed.Pubmed_ResultsPanel.Pubmed_DiscoveryPanel.Pubmed_RVAbstractPlus), [**Gao K**](http://www.ncbi.nlm.nih.gov/sites/entrez?Db=pubmed&Cmd=Search&Term="Gao K"%5BAuthor%5D&itool=EntrezSystem2.PEntrez.Pubmed.Pubmed_ResultsPanel.Pubmed_DiscoveryPanel.Pubmed_RVAbstractPlus).

Sydney Head and Neck Cancer Institute, Sydney Cancer Centre, Royal Prince Alfred Hospital and University of Sydney, Sydney, Australia.

BACKGROUND: The aim of this study was to report the applications, complications, and limitations of the radial forearm flap when used for reconstruction after excision of cancers in the mouth. PATIENTS AND METHODS: We reviewed records in our database from October 1987 to December 2002; a total of 505 patients had surgical defects of the head and neck reconstructed with a radial forearm flap: 258 patients had oral cancers, of whom 173 were men and 85 women, median age was 70 years. Five patients had two reconstructions (total 263), of which 247 were fasciocutaneous and 16 osseofasciocutaneous flaps. Mucosal squamous carcinoma accounted for 97% of the primary cancers. RESULTS: There were nine failures of the flap (3.4%) and four episodes of partial necrosis. Four patients (2%) died within 30 days of operation. Orocutaneous fistulas appeared in nine patients (3.4%), 10 patients had wound infections, and nine had haematomas. The nine failed flaps were replaced by a second free flap in one patient, a pectoralis major flap in three, a buccinator myomucosal flap in one, a skin graft in one, and the remaining three defects healed by secondary intention. There was one failure and one partial failure among the 16 osseofasciocutaneous flaps.

PMID: 15888352 [PubMed - indexed for MEDLINE]

[Ann Plast Surg.](javascript:AL_get(this, 'jour', 'Ann Plast Surg.');) 2006 May;56(5):536-9.[
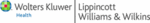
](http://www.ncbi.nlm.nih.gov/entrez/utils/fref.fcgi?PrId=3159&itool=AbstractPlus-def&uid=16641631&db=pubmed&url=http://meta.wkhealth.com/pt/pt-core/template-journal/lwwgateway/media/landingpage.htm?an=00000637-200605000-00013)
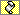
[Links](javascript:PopUpMenu2_Set(Menu16641631);)

## Use of the anterolateral thigh flap as an alternative to the rectus flap in obese and overweight patients.

[**Davidge K**](http://www.ncbi.nlm.nih.gov/sites/entrez?Db=pubmed&Cmd=Search&Term="Davidge K"%5BAuthor%5D&itool=EntrezSystem2.PEntrez.Pubmed.Pubmed_ResultsPanel.Pubmed_DiscoveryPanel.Pubmed_RVAbstractPlus), [**Pusic A**](http://www.ncbi.nlm.nih.gov/sites/entrez?Db=pubmed&Cmd=Search&Term="Pusic A"%5BAuthor%5D&itool=EntrezSystem2.PEntrez.Pubmed.Pubmed_ResultsPanel.Pubmed_DiscoveryPanel.Pubmed_RVAbstractPlus), [**Disa JJ**](http://www.ncbi.nlm.nih.gov/sites/entrez?Db=pubmed&Cmd=Search&Term="Disa JJ"%5BAuthor%5D&itool=EntrezSystem2.PEntrez.Pubmed.Pubmed_ResultsPanel.Pubmed_DiscoveryPanel.Pubmed_RVAbstractPlus), [**Mehrara BJ**](http://www.ncbi.nlm.nih.gov/sites/entrez?Db=pubmed&Cmd=Search&Term="Mehrara BJ"%5BAuthor%5D&itool=EntrezSystem2.PEntrez.Pubmed.Pubmed_ResultsPanel.Pubmed_DiscoveryPanel.Pubmed_RVAbstractPlus).

Division of Plastic and Reconstructive Surgery and the Department of Surgery, Memorial Sloan-Kettering Cancer Center, New York, NY, USA.

INTRODUCTION: Oncologic reconstruction in obese patients can be challenging. Donor tissues, such as the rectus flap, can be excessively bulky and result in significant cosmetic and functional deformities. Although the use of the anterolateral thigh (ALT) flap as an alternative to the radial forearm flap has been extensively described, few studies have evaluated the use of the ALT flap as an alternative to the rectus flap. The purpose of this study was to evaluate our experience with the ALT flap in overweight or obese patients. METHODS: A retrospective review was conducted of all ALT flaps performed over a 2-year period at Memorial Sloan-Kettering Cancer Center. All patients with a body mass index (BMI) >25 kg/m2 were identified and evaluated. RESULTS: Twenty-seven patients underwent ALT flap reconstruction during the study period. Of these, 11 patients were overweight (BMI, 25.1-30 kg/m2) or obese (BMI, >30 kg/m2). Reconstructions were performed for a variety of oncologic defects, including head and neck (n = 7), extremity (n = 2), chest wall (n = 1), and abdominal wall (n = 1). Complications were, in general, mild and infrequent. One patient experienced a minor infection, 1 patient had partial flap loss, and 2 patients had partial skin graft loss at the donor site. There were no flap losses. CONCLUSIONS: The ALT flap is a safe and reliable flap for reconstruction of diverse defects in overweight or obese patients. Large flaps can be designed and tailored to the defect by harvesting variable amounts of skin, subcutaneous tissues, fascia, and muscle. The ALT flap may be a good alternative to the rectus flap in overweight or obese patients.

PMID: 16641631 [PubMed - indexed for MEDLINE]

[Head Neck.](javascript:AL_get(this, 'jour', 'Head Neck.');) 2007 Jun;29(6):573-6.[
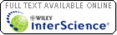
](http://www.ncbi.nlm.nih.gov/entrez/utils/fref.fcgi?PrId=3058&itool=AbstractPlus-def&uid=17252598&db=pubmed&url=http://dx.doi.org/10.1002/hed.20584)
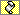
[Links](javascript:PopUpMenu2_Set(Menu17252598);)

## Incidence of donor site skin graft loss requiring surgical intervention with the radial forearm free flap.

[**Emerick KS**](http://www.ncbi.nlm.nih.gov/sites/entrez?Db=pubmed&Cmd=Search&Term="Emerick KS"%5BAuthor%5D&itool=EntrezSystem2.PEntrez.Pubmed.Pubmed_ResultsPanel.Pubmed_DiscoveryPanel.Pubmed_RVAbstractPlus), [**Deschler DG**](http://www.ncbi.nlm.nih.gov/sites/entrez?Db=pubmed&Cmd=Search&Term="Deschler DG"%5BAuthor%5D&itool=EntrezSystem2.PEntrez.Pubmed.Pubmed_ResultsPanel.Pubmed_DiscoveryPanel.Pubmed_RVAbstractPlus).

Department of Otolaryngology, Massachusetts Eye and Ear Infirmary, Boston, Massachusetts, USA. Kevin_Emerick@meei.harvard.edu

BACKGROUND: Many methods of managing the fasciocutaneous radial forearm free flap (RFFF) donor site have been described. Ideal management would be technically easy to perform, reliable, cost-effective, and prevent further complications. METHODS: The clinical records of 54 consecutive patients undergoing RFFF surgery by the senior author were reviewed. Records were reviewed to identify donor sites with significant breakdown that required intervention. RESULTS: Fifty-four patients were identified. Only 1 patient had significant tendon exposure. A V to Y closure was performed. The site healed well following this procedure and no further intervention was required. No other donor site complications were noted in this group. CONCLUSION: The incidence of wound breakdown requiring surgical intervention at the RFFF donor site is less than 2% utilizing a simple technique of split thickness skin grafting, bolster, and short-term splinting. This study demonstrates the low donor site morbidity of the RFFF. (c) 2007 Wiley Periodicals, Inc. Head Neck, 2007.

PMID: 17252598 [PubMed - indexed for MEDLINE]

[Laryngoscope.](javascript:AL_get(this, 'jour', 'Laryngoscope.');) 2004 Nov;114(11):1973-6.[
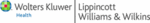
](http://www.ncbi.nlm.nih.gov/entrez/utils/fref.fcgi?PrId=3159&itool=AbstractPlus-def&uid=15510025&db=pubmed&url=http://meta.wkhealth.com/pt/pt-core/template-journal/lwwgateway/media/landingpage.htm?issn=0023-852X&volume=114&issue=11&spage=1973)
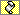
[Links](javascript:PopUpMenu2_Set(Menu15510025);)

## Evaluation of donor site function and morbidity of the fasciocutaneous radial forearm flap.

[**de Bree R**](http://www.ncbi.nlm.nih.gov/sites/entrez?Db=pubmed&Cmd=Search&Term="de Bree R"%5BAuthor%5D&itool=EntrezSystem2.PEntrez.Pubmed.Pubmed_ResultsPanel.Pubmed_DiscoveryPanel.Pubmed_RVAbstractPlus), [**Hartley C**](http://www.ncbi.nlm.nih.gov/sites/entrez?Db=pubmed&Cmd=Search&Term="Hartley C"%5BAuthor%5D&itool=EntrezSystem2.PEntrez.Pubmed.Pubmed_ResultsPanel.Pubmed_DiscoveryPanel.Pubmed_RVAbstractPlus), [**Smeele LE**](http://www.ncbi.nlm.nih.gov/sites/entrez?Db=pubmed&Cmd=Search&Term="Smeele LE"%5BAuthor%5D&itool=EntrezSystem2.PEntrez.Pubmed.Pubmed_ResultsPanel.Pubmed_DiscoveryPanel.Pubmed_RVAbstractPlus), [**Kuik DJ**](http://www.ncbi.nlm.nih.gov/sites/entrez?Db=pubmed&Cmd=Search&Term="Kuik DJ"%5BAuthor%5D&itool=EntrezSystem2.PEntrez.Pubmed.Pubmed_ResultsPanel.Pubmed_DiscoveryPanel.Pubmed_RVAbstractPlus), [**Quak JJ**](http://www.ncbi.nlm.nih.gov/sites/entrez?Db=pubmed&Cmd=Search&Term="Quak JJ"%5BAuthor%5D&itool=EntrezSystem2.PEntrez.Pubmed.Pubmed_ResultsPanel.Pubmed_DiscoveryPanel.Pubmed_RVAbstractPlus), [**Leemans CR**](http://www.ncbi.nlm.nih.gov/sites/entrez?Db=pubmed&Cmd=Search&Term="Leemans CR"%5BAuthor%5D&itool=EntrezSystem2.PEntrez.Pubmed.Pubmed_ResultsPanel.Pubmed_DiscoveryPanel.Pubmed_RVAbstractPlus).

Department of Otolaryngology/Head and Neck Surgery, the VU Medical Center, Amsterdam, The Netherlands. r.bree@vumc.nl

OBJECTIVE: To assess the results of the use of the free radial forearm flap in terms of objective morbidity and subjective patient response. STUDY DESIGN: The donor sites were examined from 37 patients who underwent reconstruction with a free fasciocutaneous radial forearm flap in the head and neck after ablative tumor surgery. METHODS: Patients were asked to fill in a written questionnaire. The following additional tests were performed: resting skin temperature of digits I and V, temperature after submersion in iced water, grip and pinch tests, and goniometry. RESULTS: Resting skin temperature was slightly decreased for donor hands 0.69 degrees C (P < .001) and 0.31 degrees C (P = .048) for digits I and V, respectively, but recovery after submersion in iced water showed no differences. The strength tests and goniometry revealed no statistically significant findings between donor and control sides. On the questionnaire, 9 patients (24%) reported slightly impaired function, 14 (38%) could not wear their watch or bracelet, 17 (46%) reported numbness, 5 (14%) reported soreness, 5 (14%) reported itching, 6 (16%) reported cold intolerance, 5 (14%) reported bad cosmetic appearance, and 9 (24%) expressed the opinion that they were insufficiently counseled. CONCLUSION: There is a negligible objective morbidity of a free radial forearm flap harvest procedure, but a number of patients have subjective complaints when asked. Elaborate presurgical counseling can probably reduce these complaints.

PMID: 15510025 [PubMed - indexed for MEDLINE]
